# Supplementary material for: On Bisphosphonates and COVID-19: In Silico Model Suggests Inhibition of SARS-CoV-2 RdRp as Potential Explanation
Source: Preprints.org preprint supplement (doi:10.20944/preprints202311.1727.v3), 2024-02-26
Supplement: Supplementary file 1 [file supplementary]

On Bisphosphonates and COVID-19: *In silico* Model Suggests Inhibition of SARS-CoV-2 RdRp as Potential Explanation

Muzaffar-Ur-Rehman Mohammed 1 ‡, Kishor Suryakant Chougule 1 ‡, Chandu Ala 1, Pranali Vijaykumar Kuthe 1, Mohit Garg 2, Murugesan Sankaranarayanan 1*[
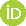
](https://orcid.org/0000-0002-3680-1577), and Seshadri S. Vasan 3, 4*[
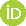
](https://orcid.org/0000-0002-7326-3210)

1 Department of Pharmacy, Birla Institute of Technology and Science, Pilani 333031, India; [p20210457@pilani.bits-pilani.ac.in](mailto:p20210457@pilani.bits-pilani.ac.in), [h20210293@pilani.bits-pilani.ac.in](mailto:h20210293@pilani.bits-pilani.ac.in), [p20210055@pilani.bits-pilani.ac.in](mailto:p20210055@pilani.bits-pilani.ac.in), [p20220062@pilani.bits-pilani.ac.in](mailto:p20220062@pilani.bits-pilani.ac.in), [murugesan@pilani.bits-pilani.ac.in](mailto:murugesan@pilani.bits-pilani.ac.in)

2 Department of Chemical Engineering, Birla Institute of Technology and Science, Pilani 333031, India; [mohit.garg@pilani.bits-pilani.ac.in](mailto:mohit.garg@pilani.bits-pilani.ac.in)

3 School of Medical and Health Sciences, Edith Cowan University, Joondalup, WA 6027, Australia

4 Department of Health Sciences, University of York, York YO10 5DD, U.K; [prof.vasan@york.ac.uk](mailto:prof.vasan@york.ac.uk)

***** Correspondence: [murugesan@pilani.bits-pilani.ac.in](mailto:murugesan@pilani.bits-pilani.ac.in) or [prof.vasan@york.ac.uk](mailto:prof.vasan@york.ac.uk)

‡ These authors contributed equally to this work.

**Table 1:** Timeline plots and 2D interaction diagrams of the selected seven hit compounds

| **S. no** | **Time-line plot** | **2D interaction diagram** |
| --- | --- | --- |
| 1. | CHEMBL164344  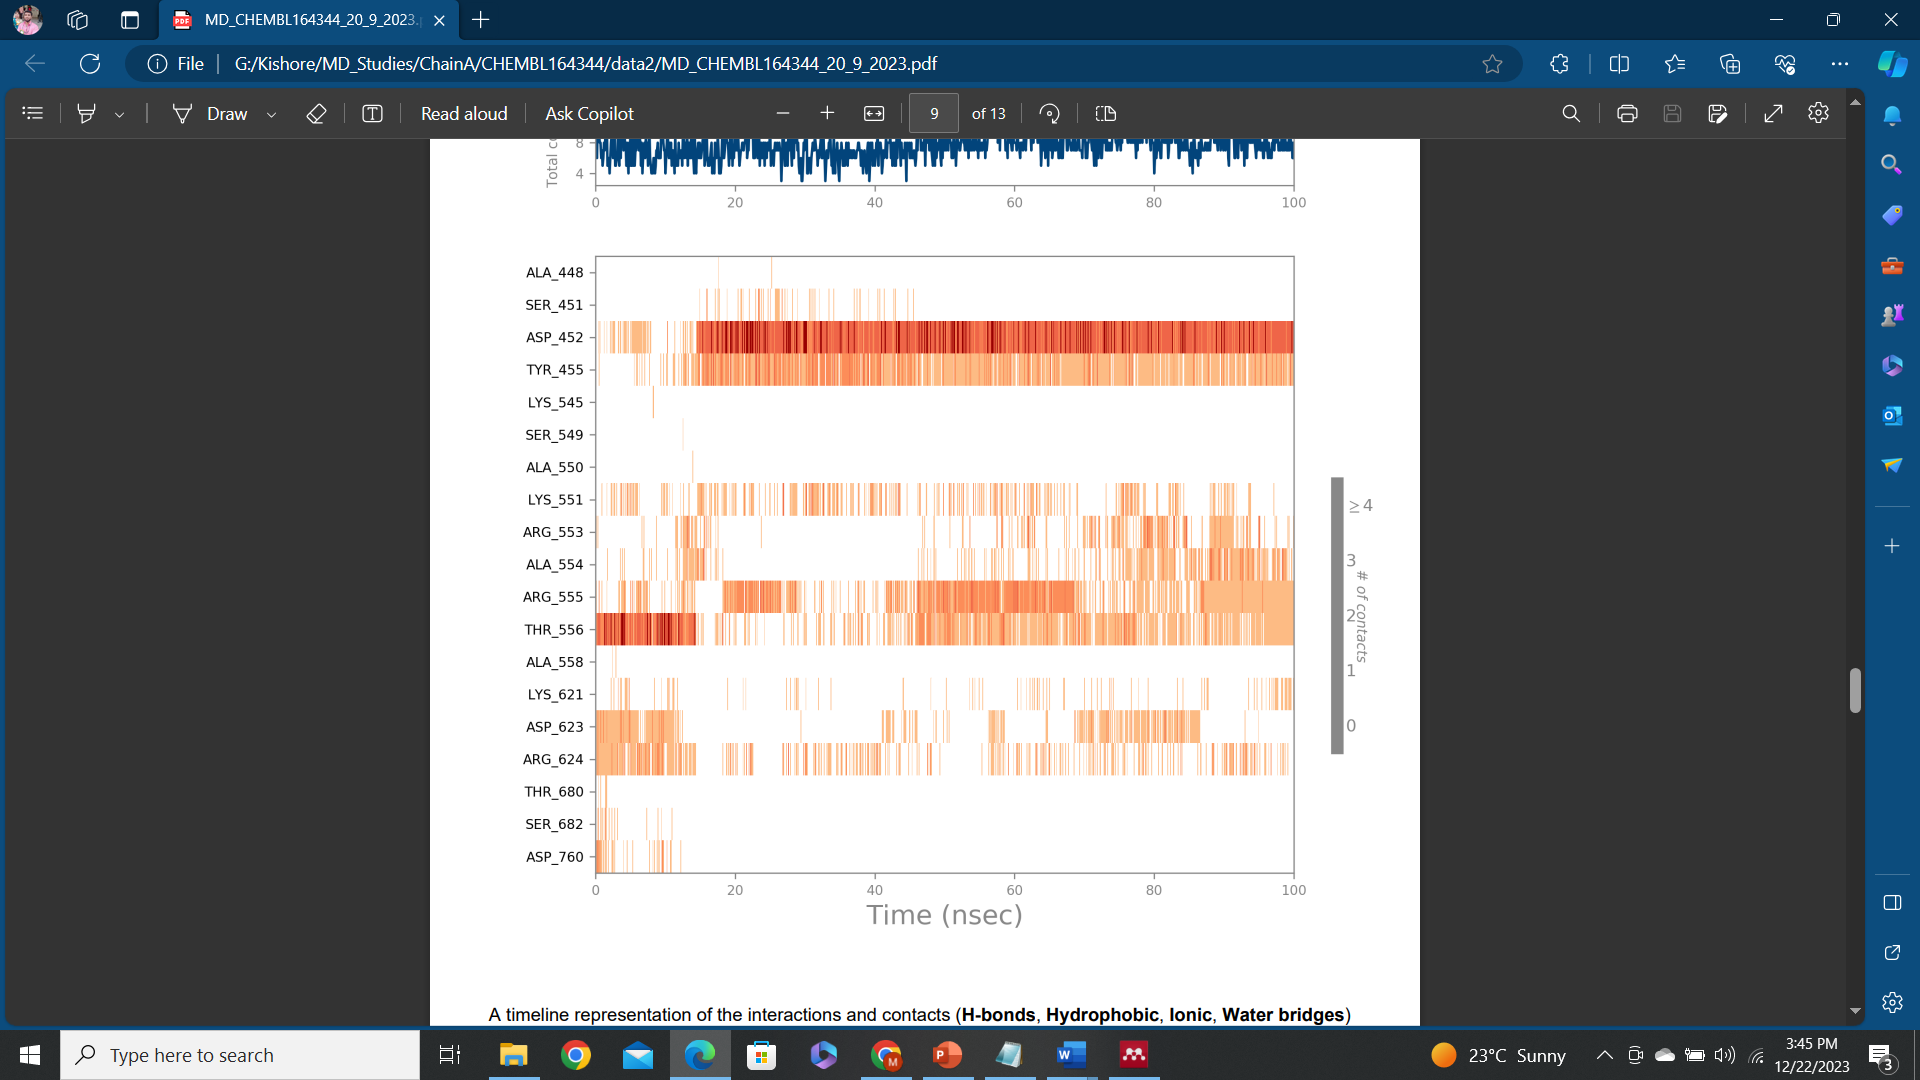 | 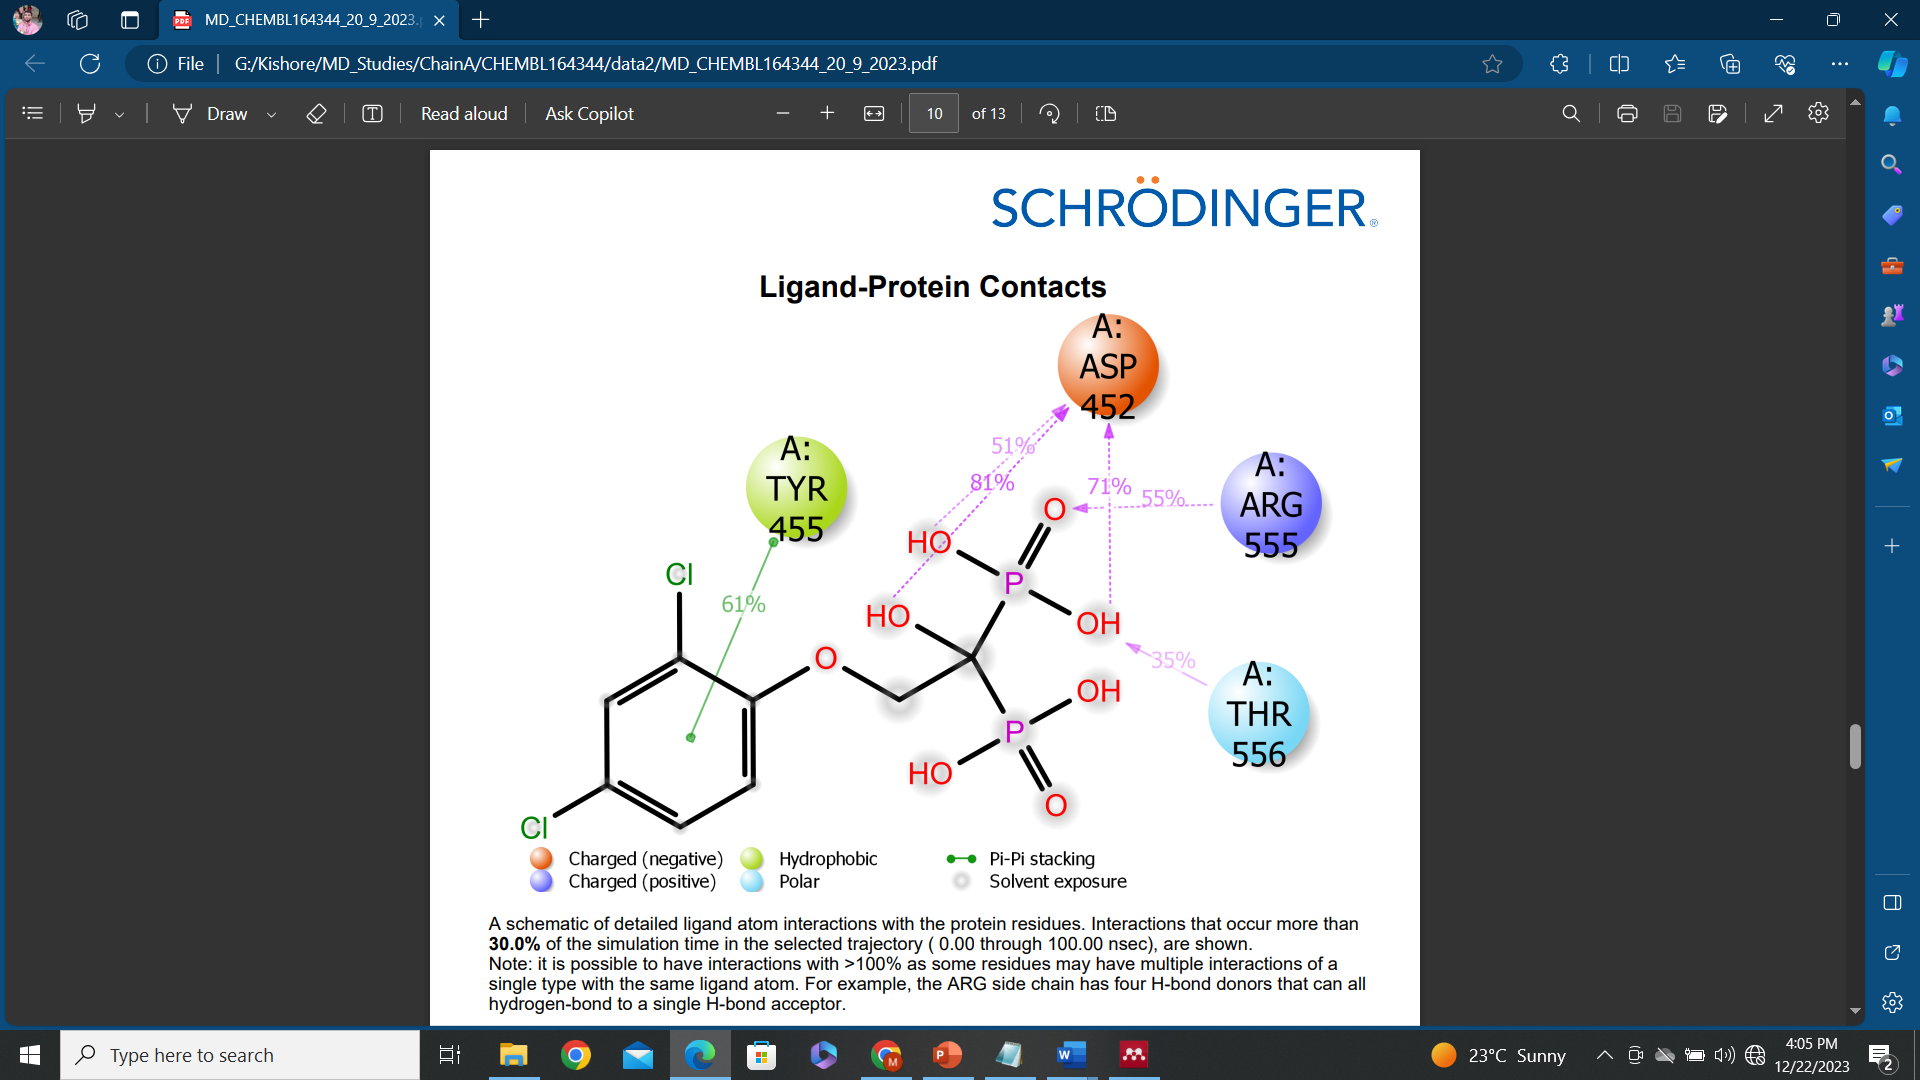 |
| 2. | CHEMBL196676  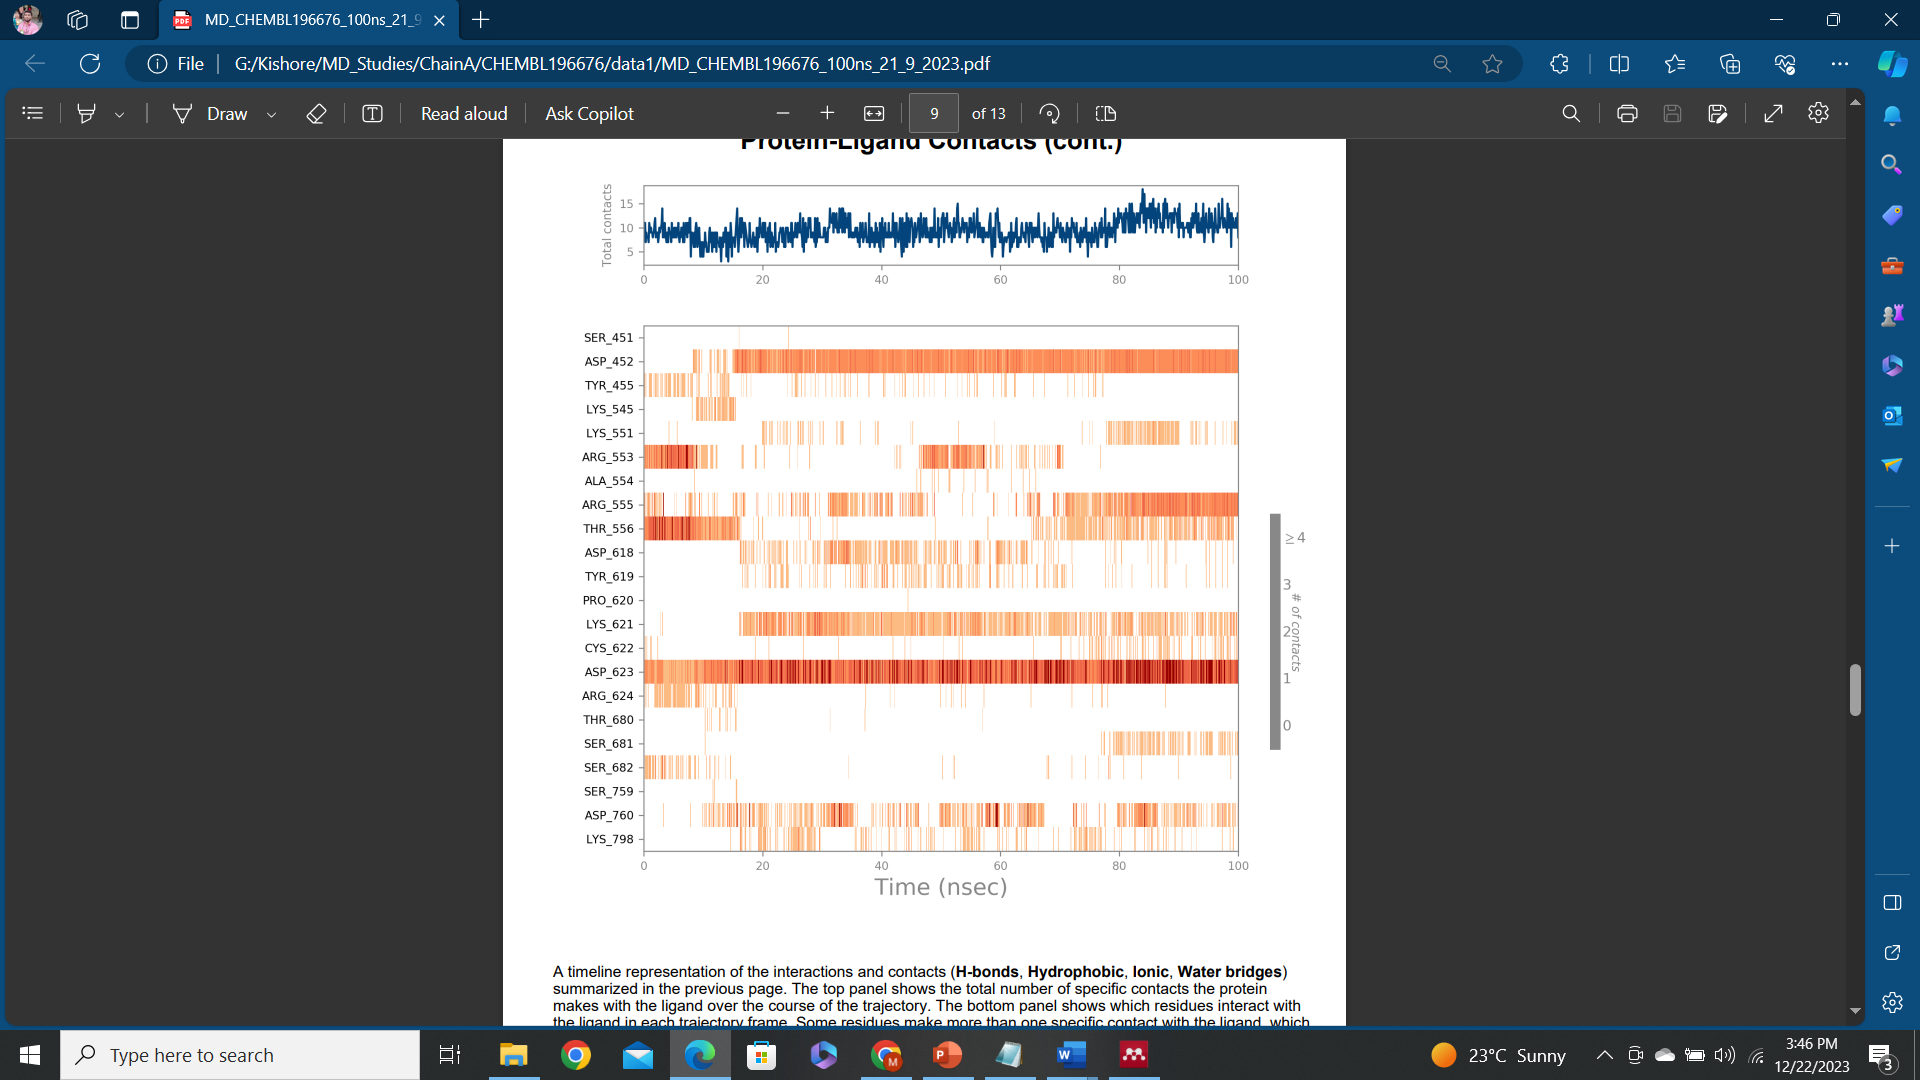 | 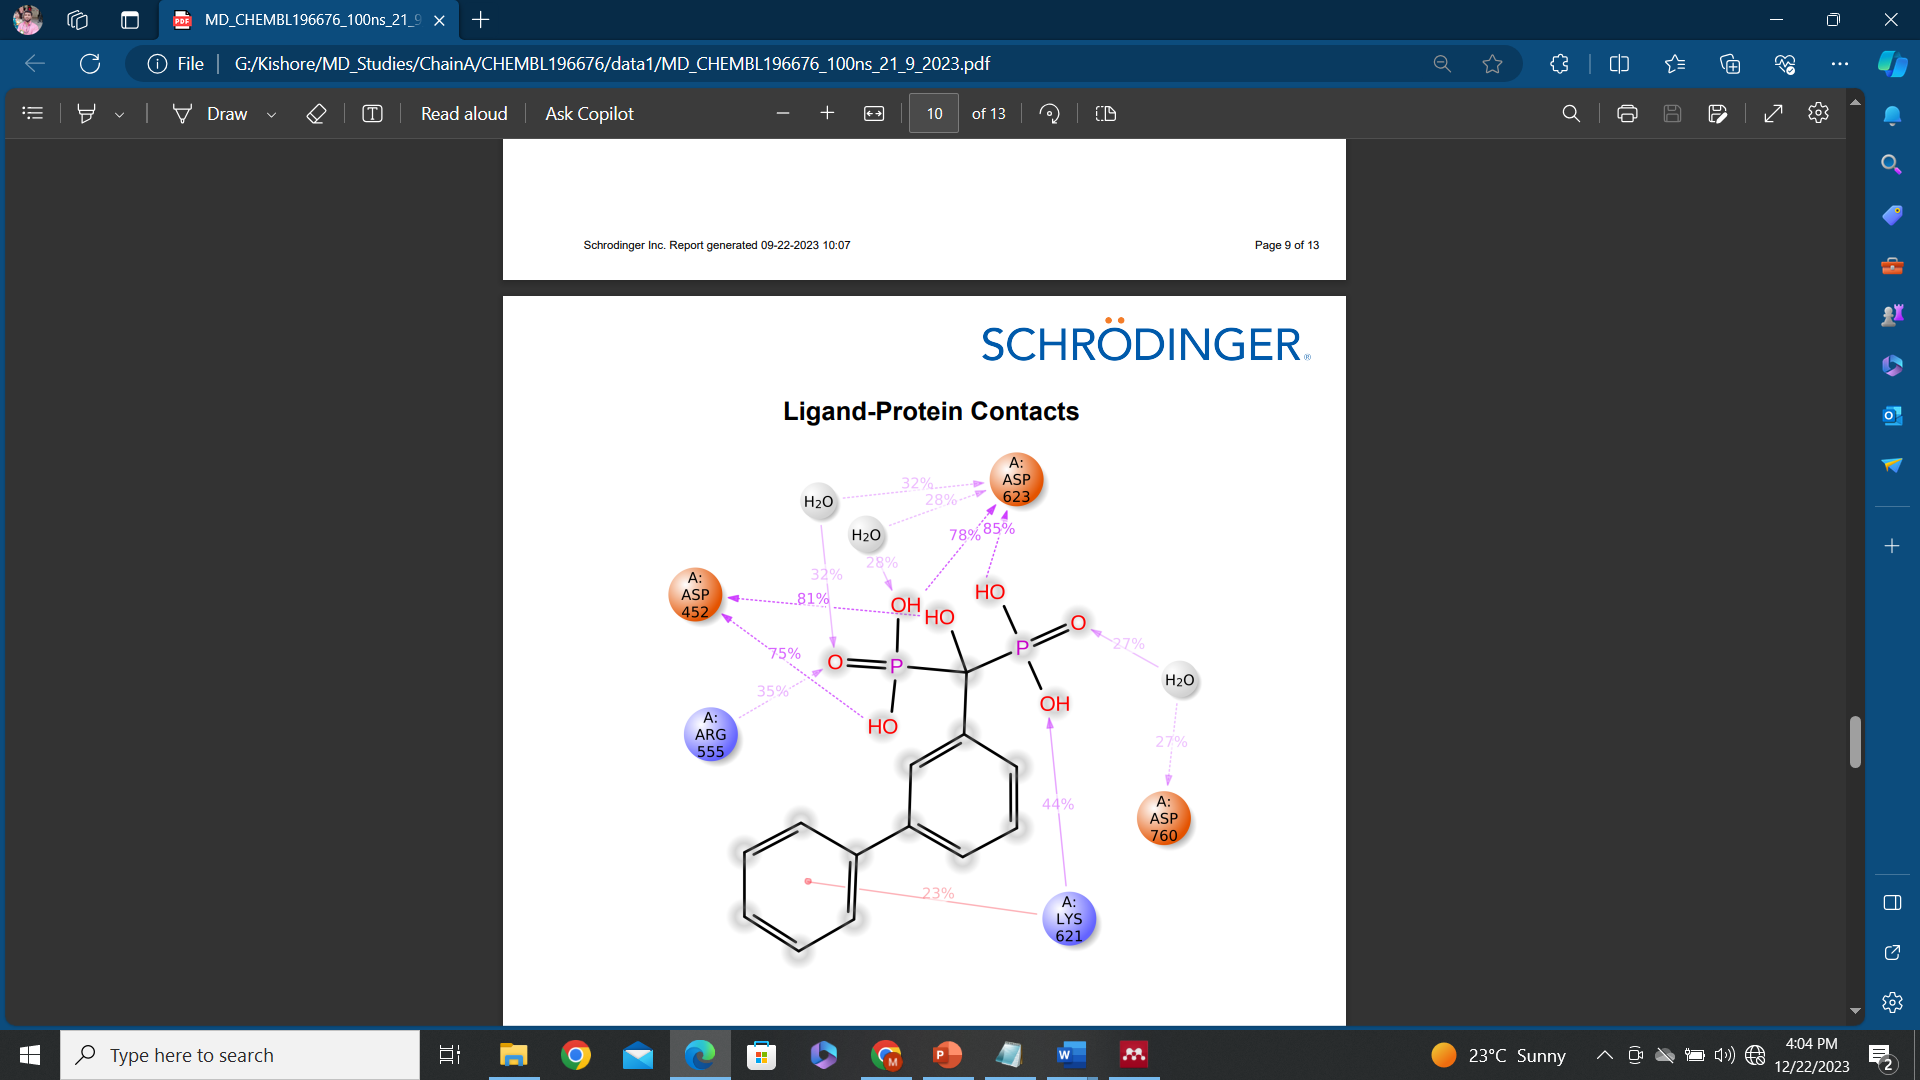 |
| 3. | CHEMBL387132  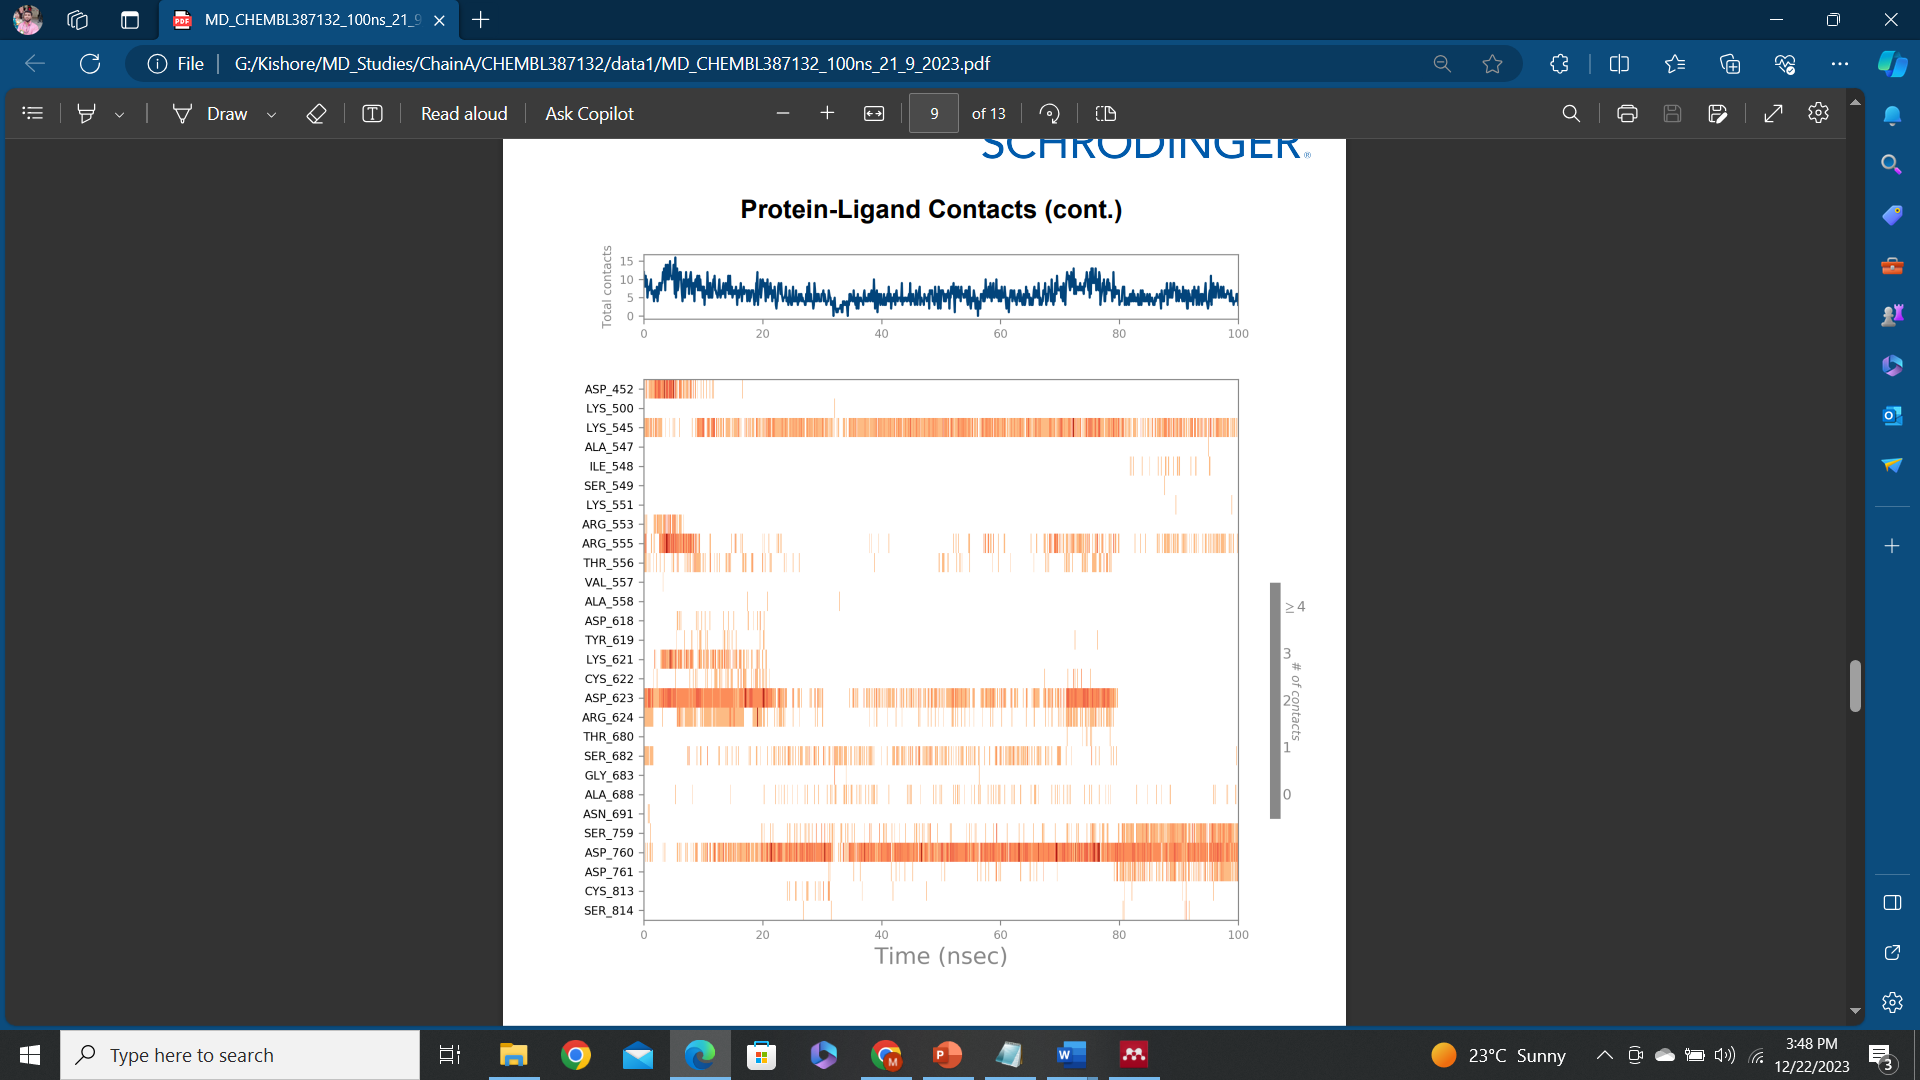 | 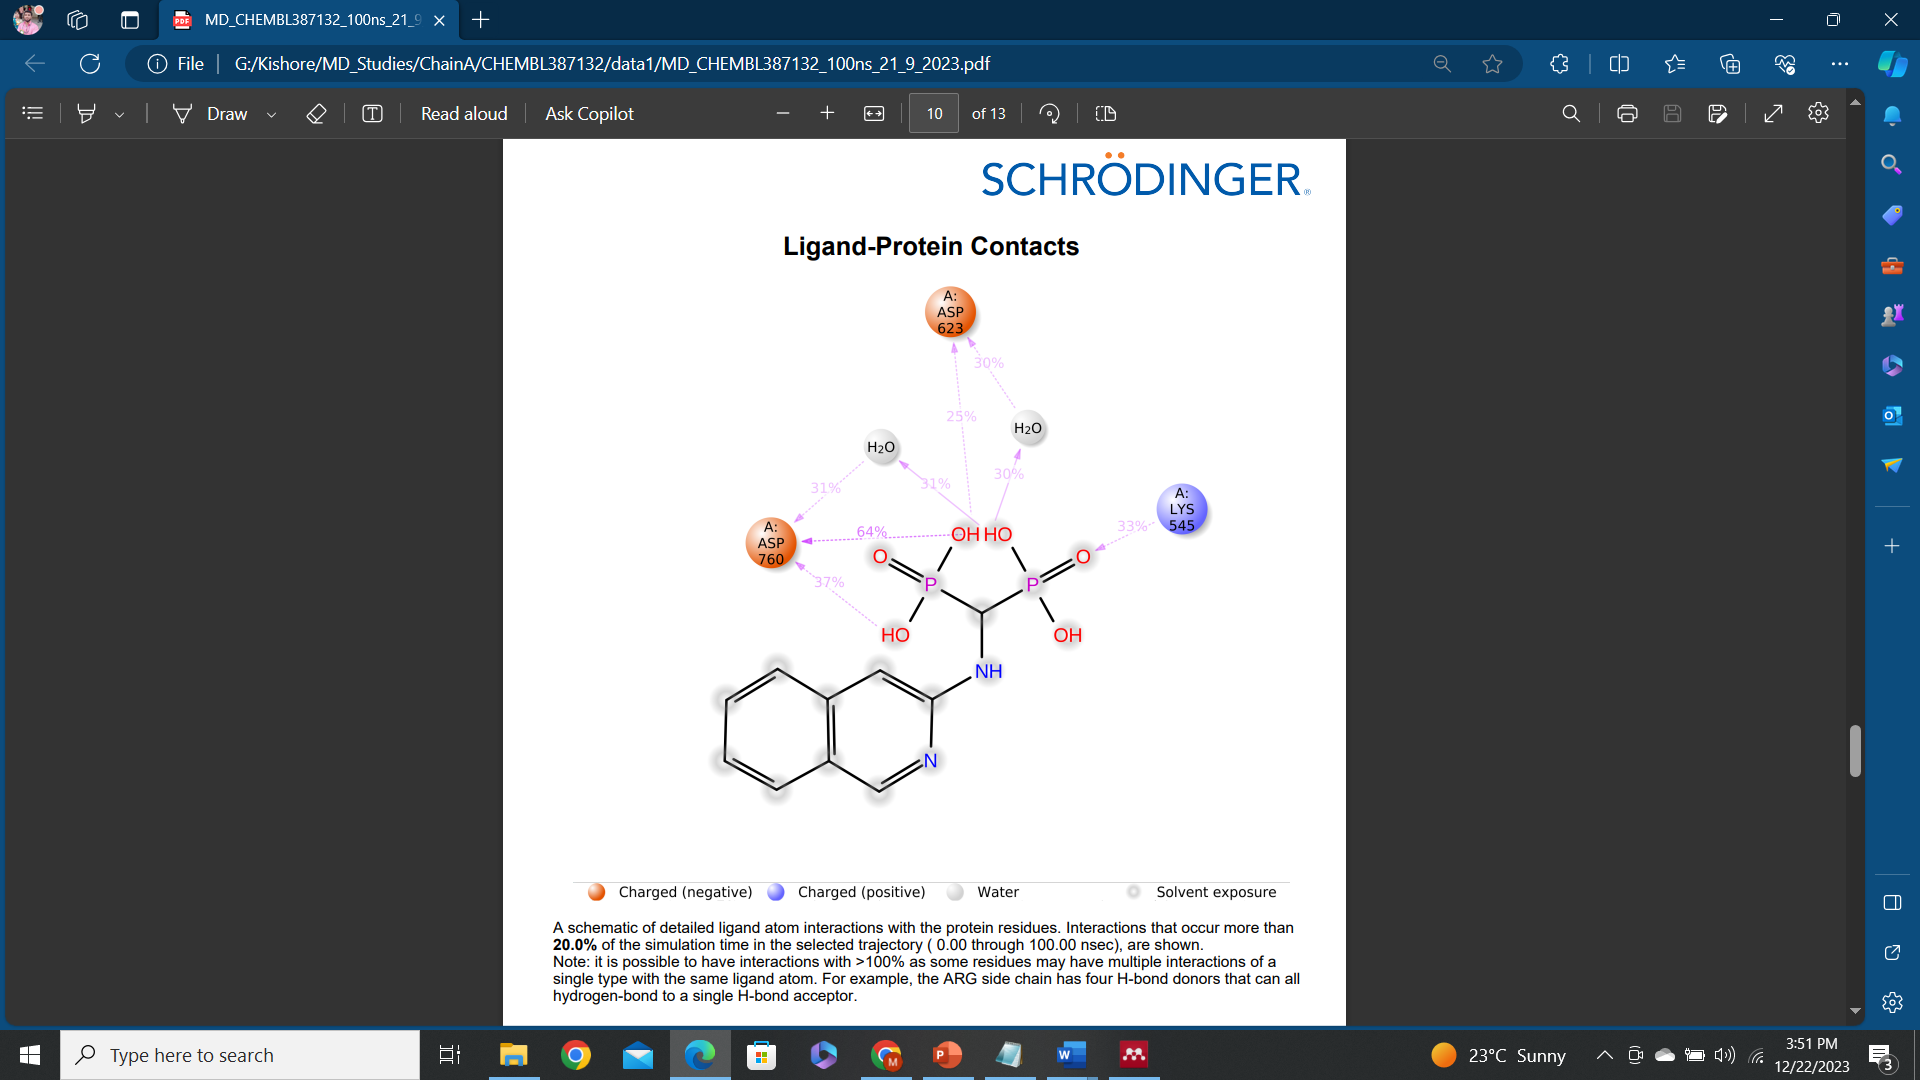 |
| 4. | CHEMBL4291724  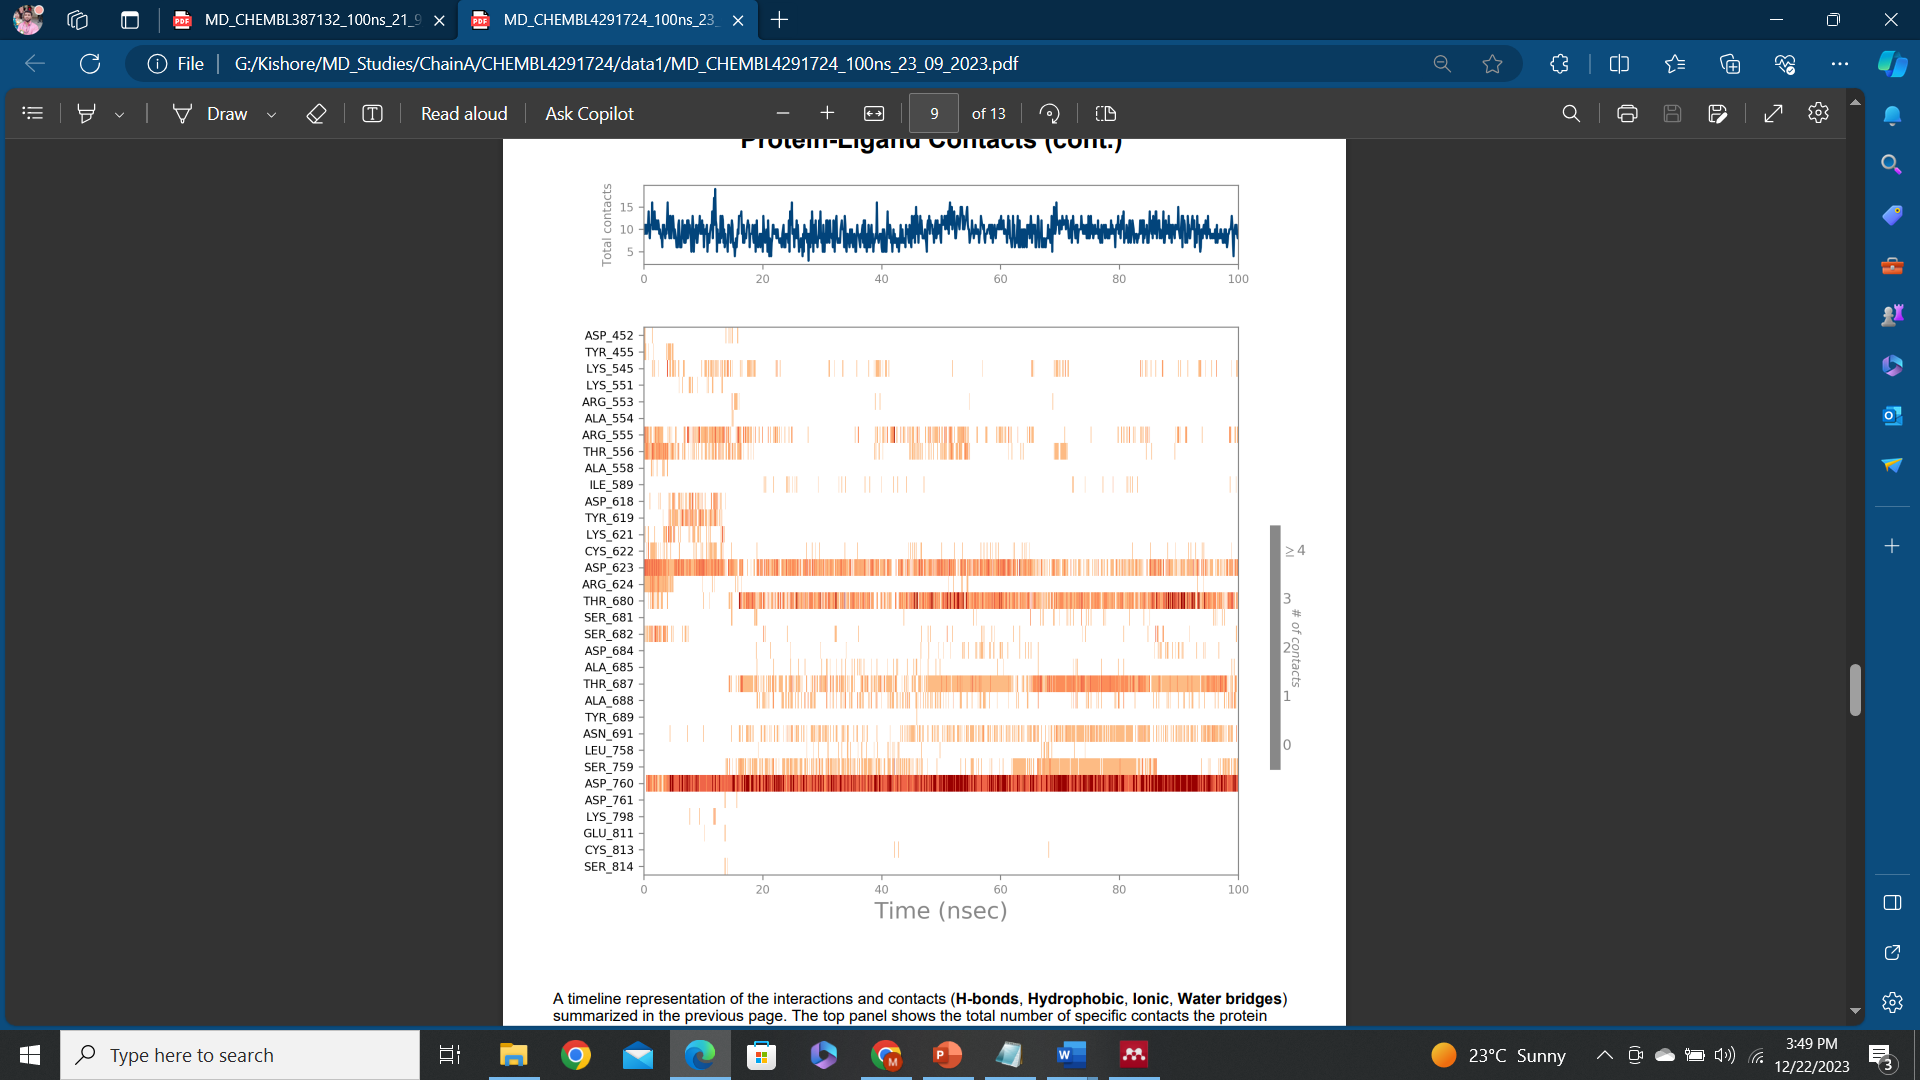 | 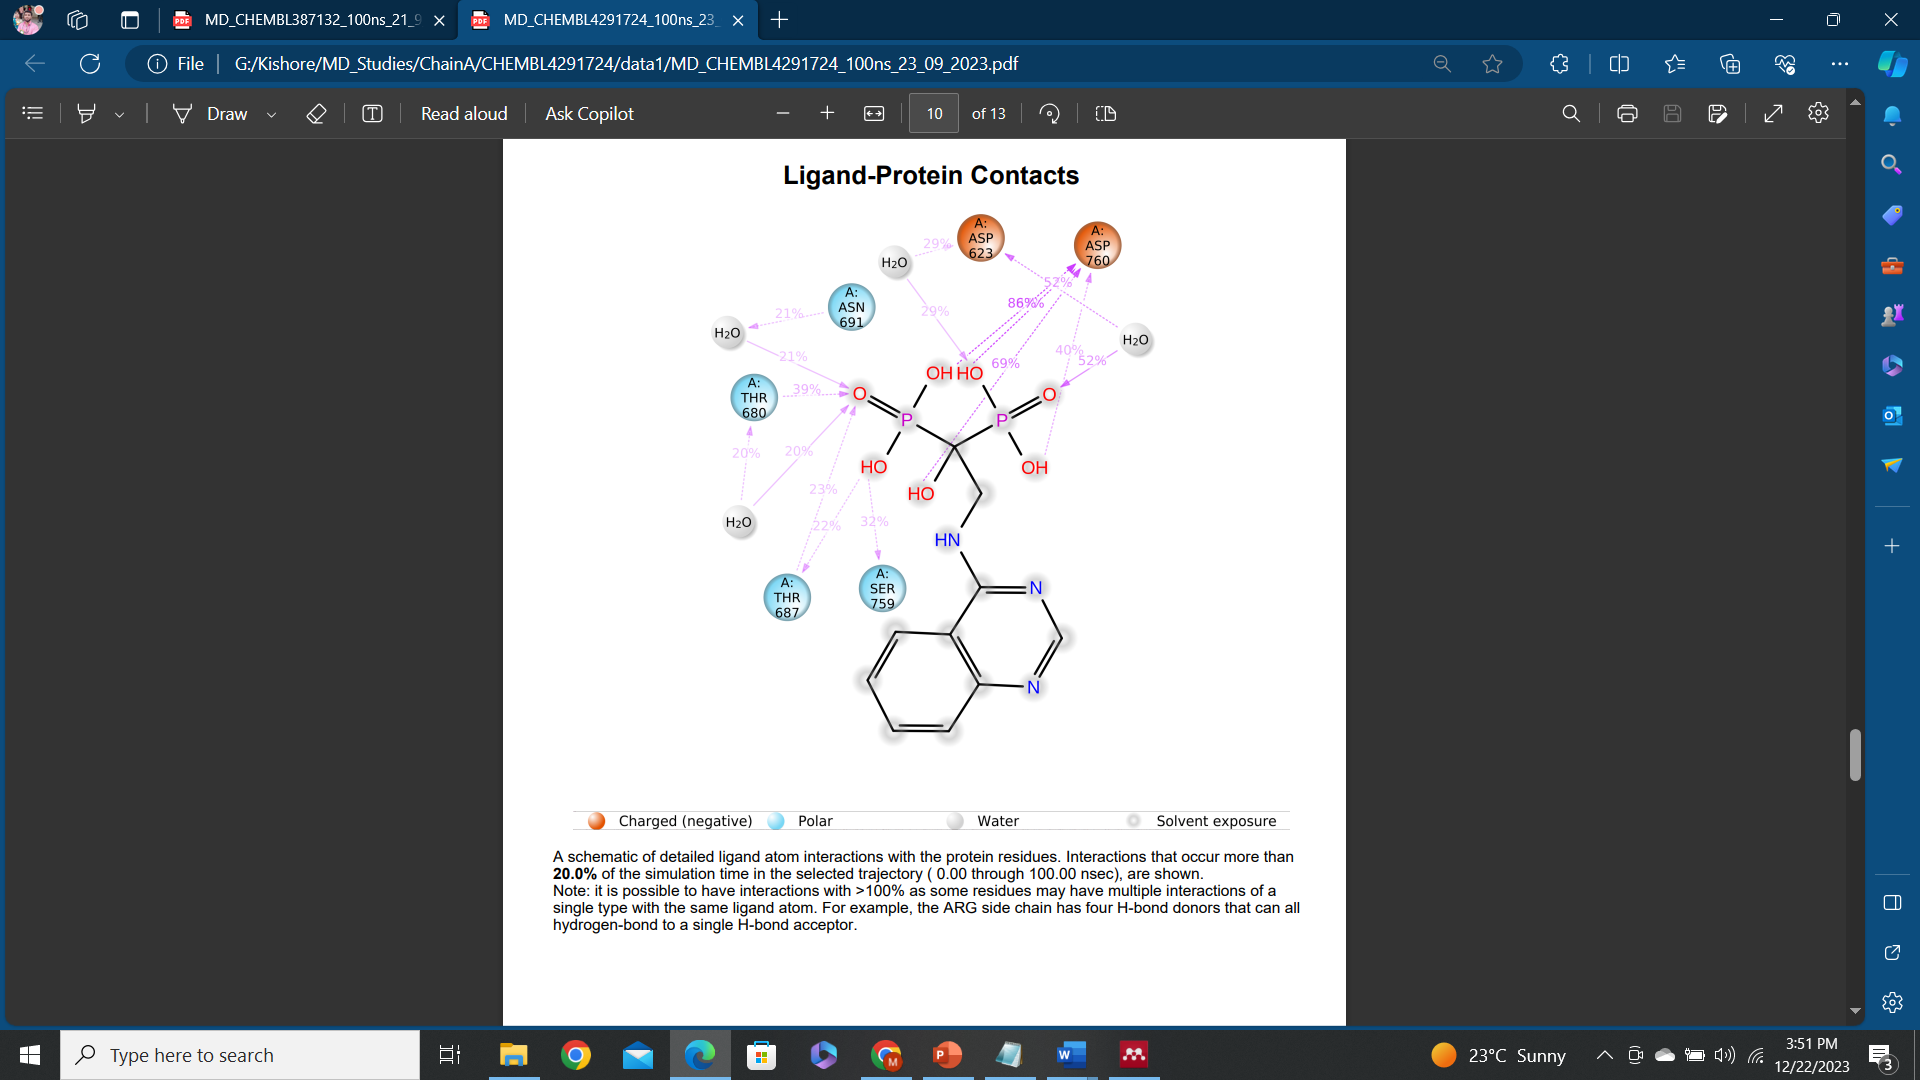 |
| 5. | CHEMBL608526†  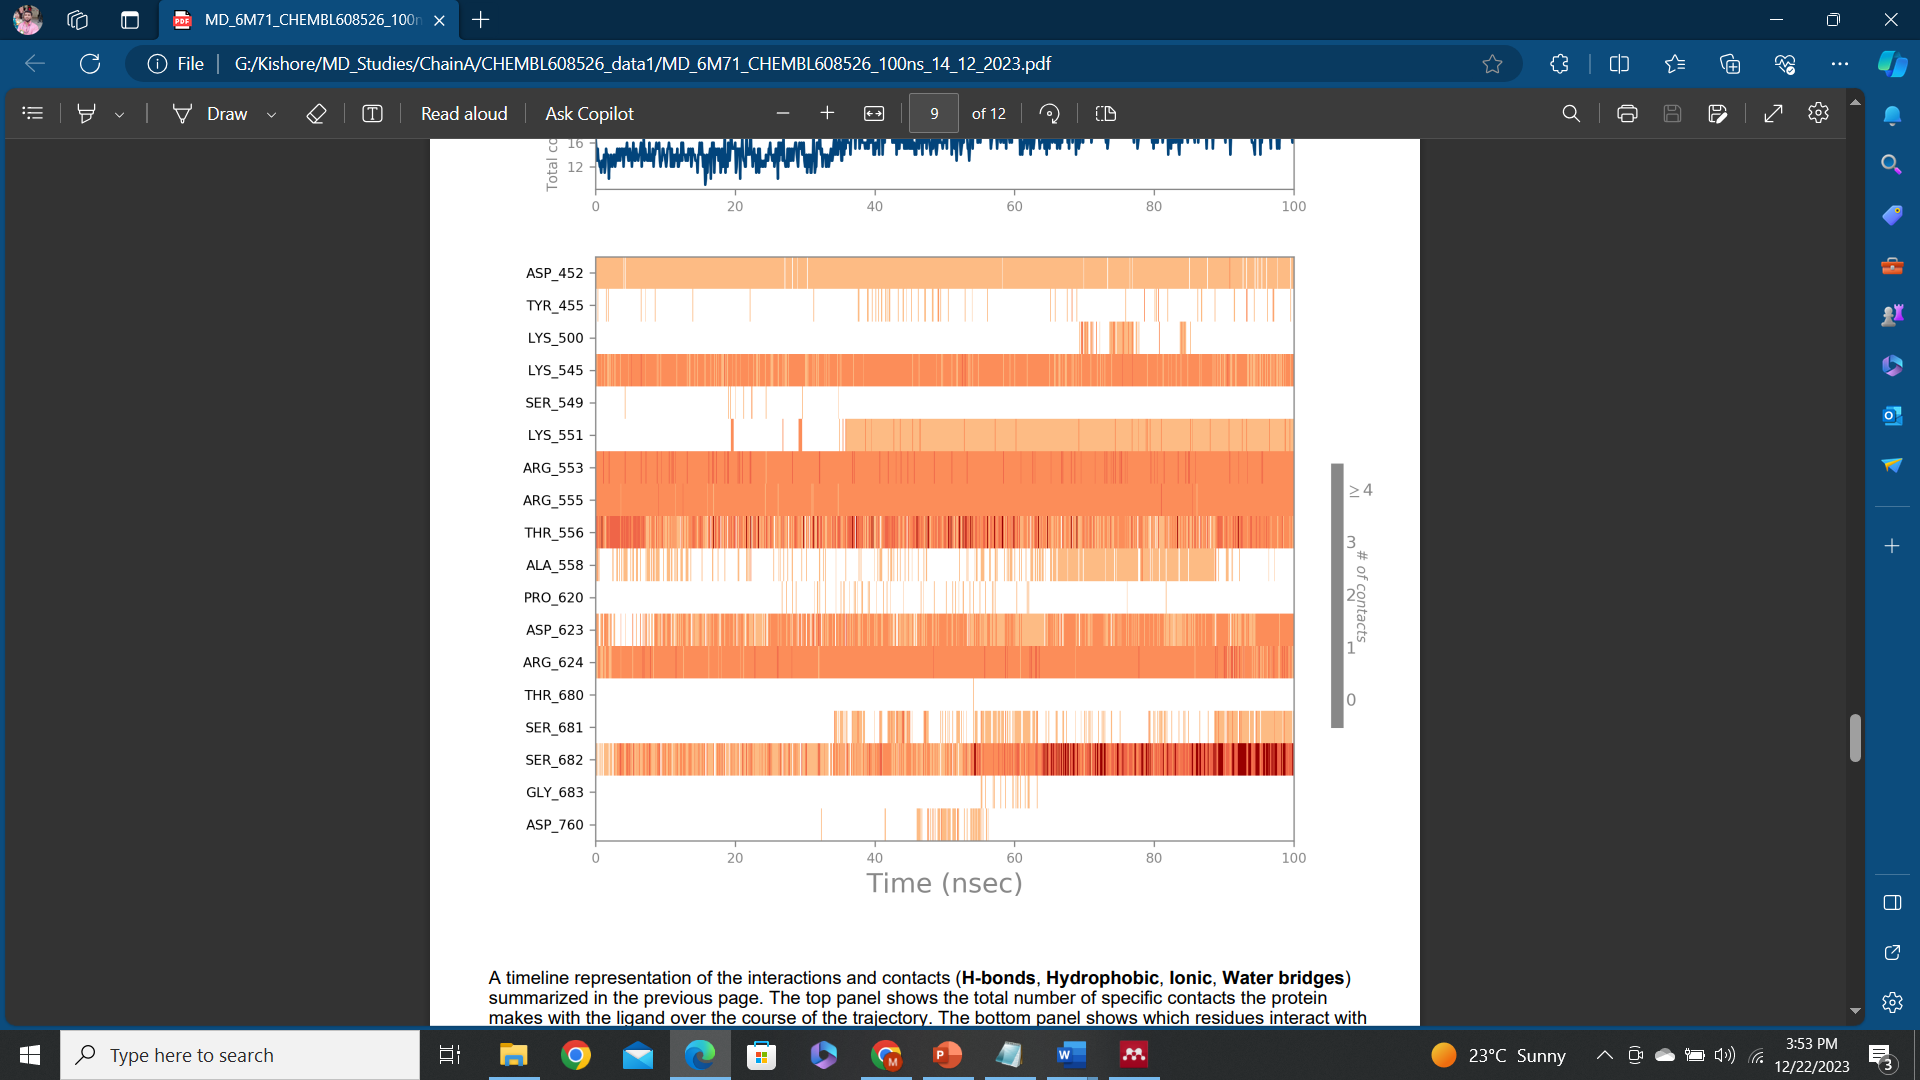 | 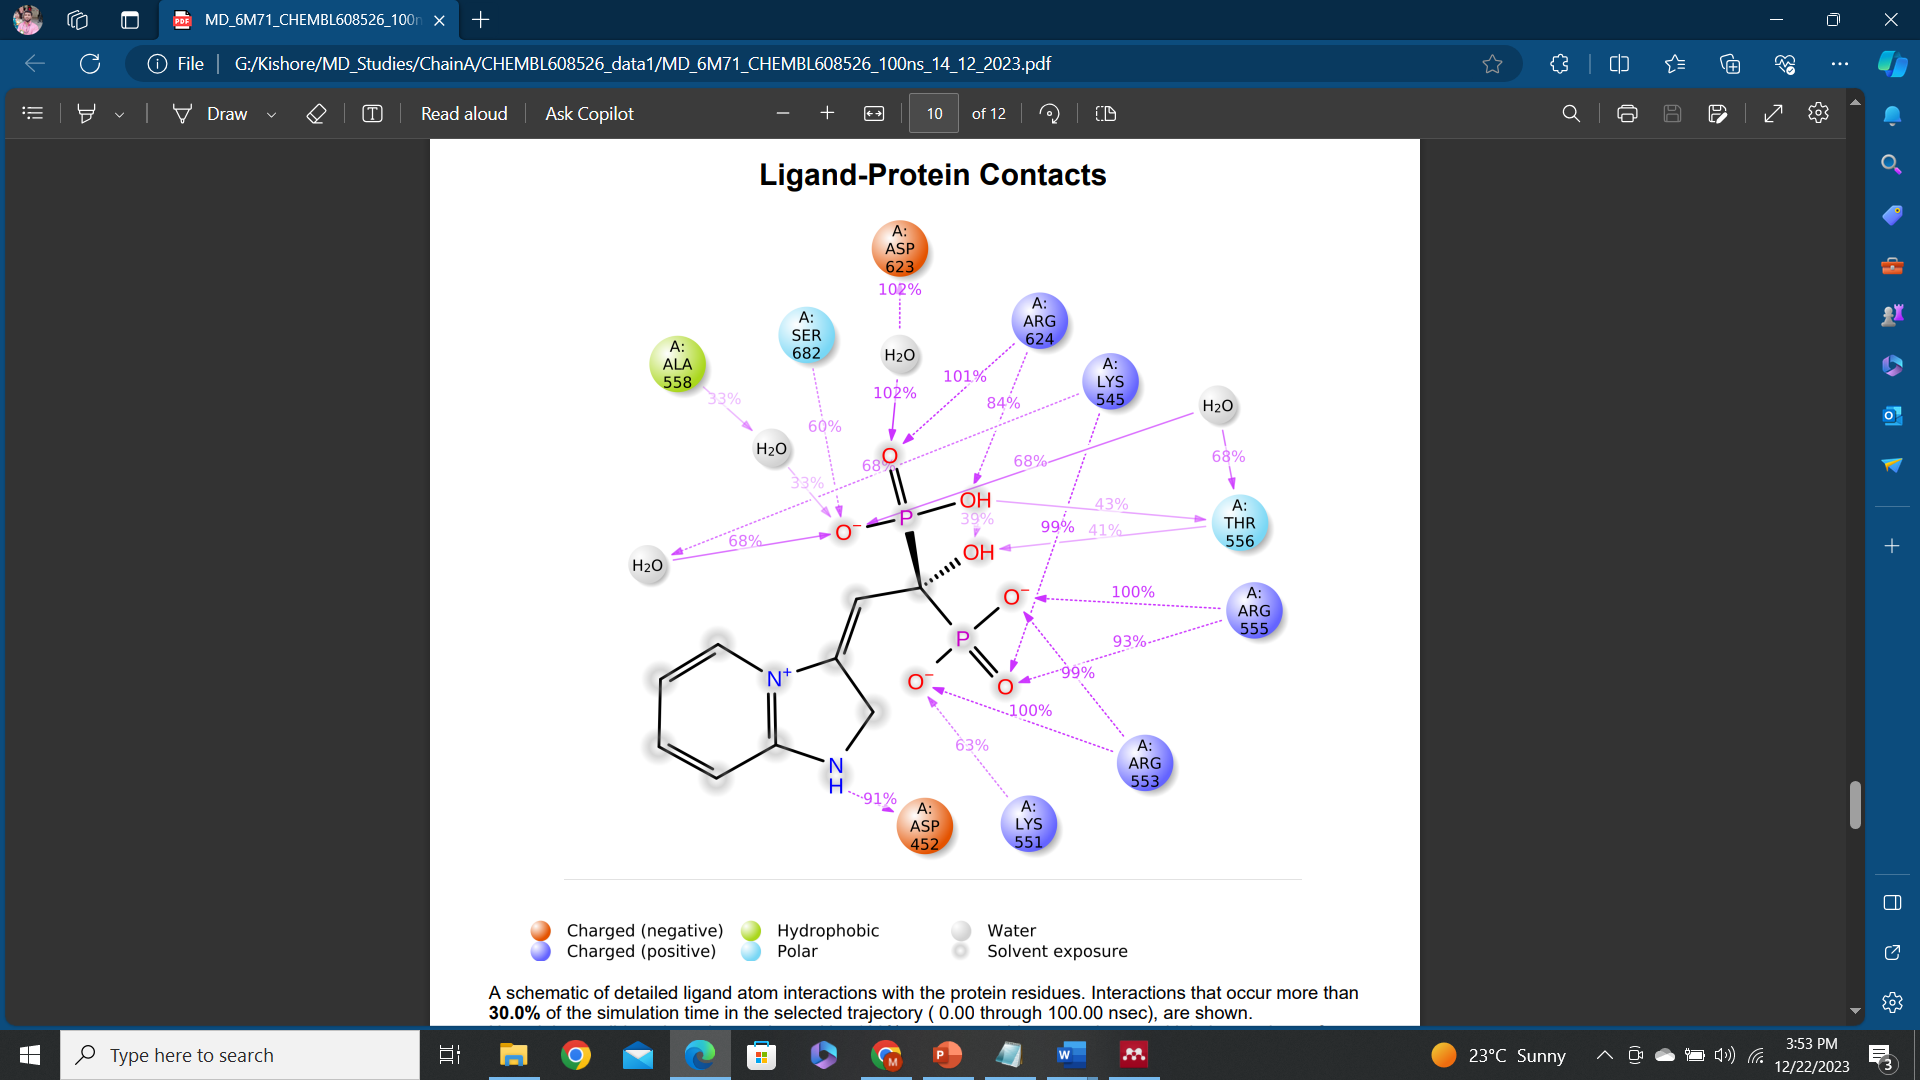 |
| 6. | CHEMBL4569308†  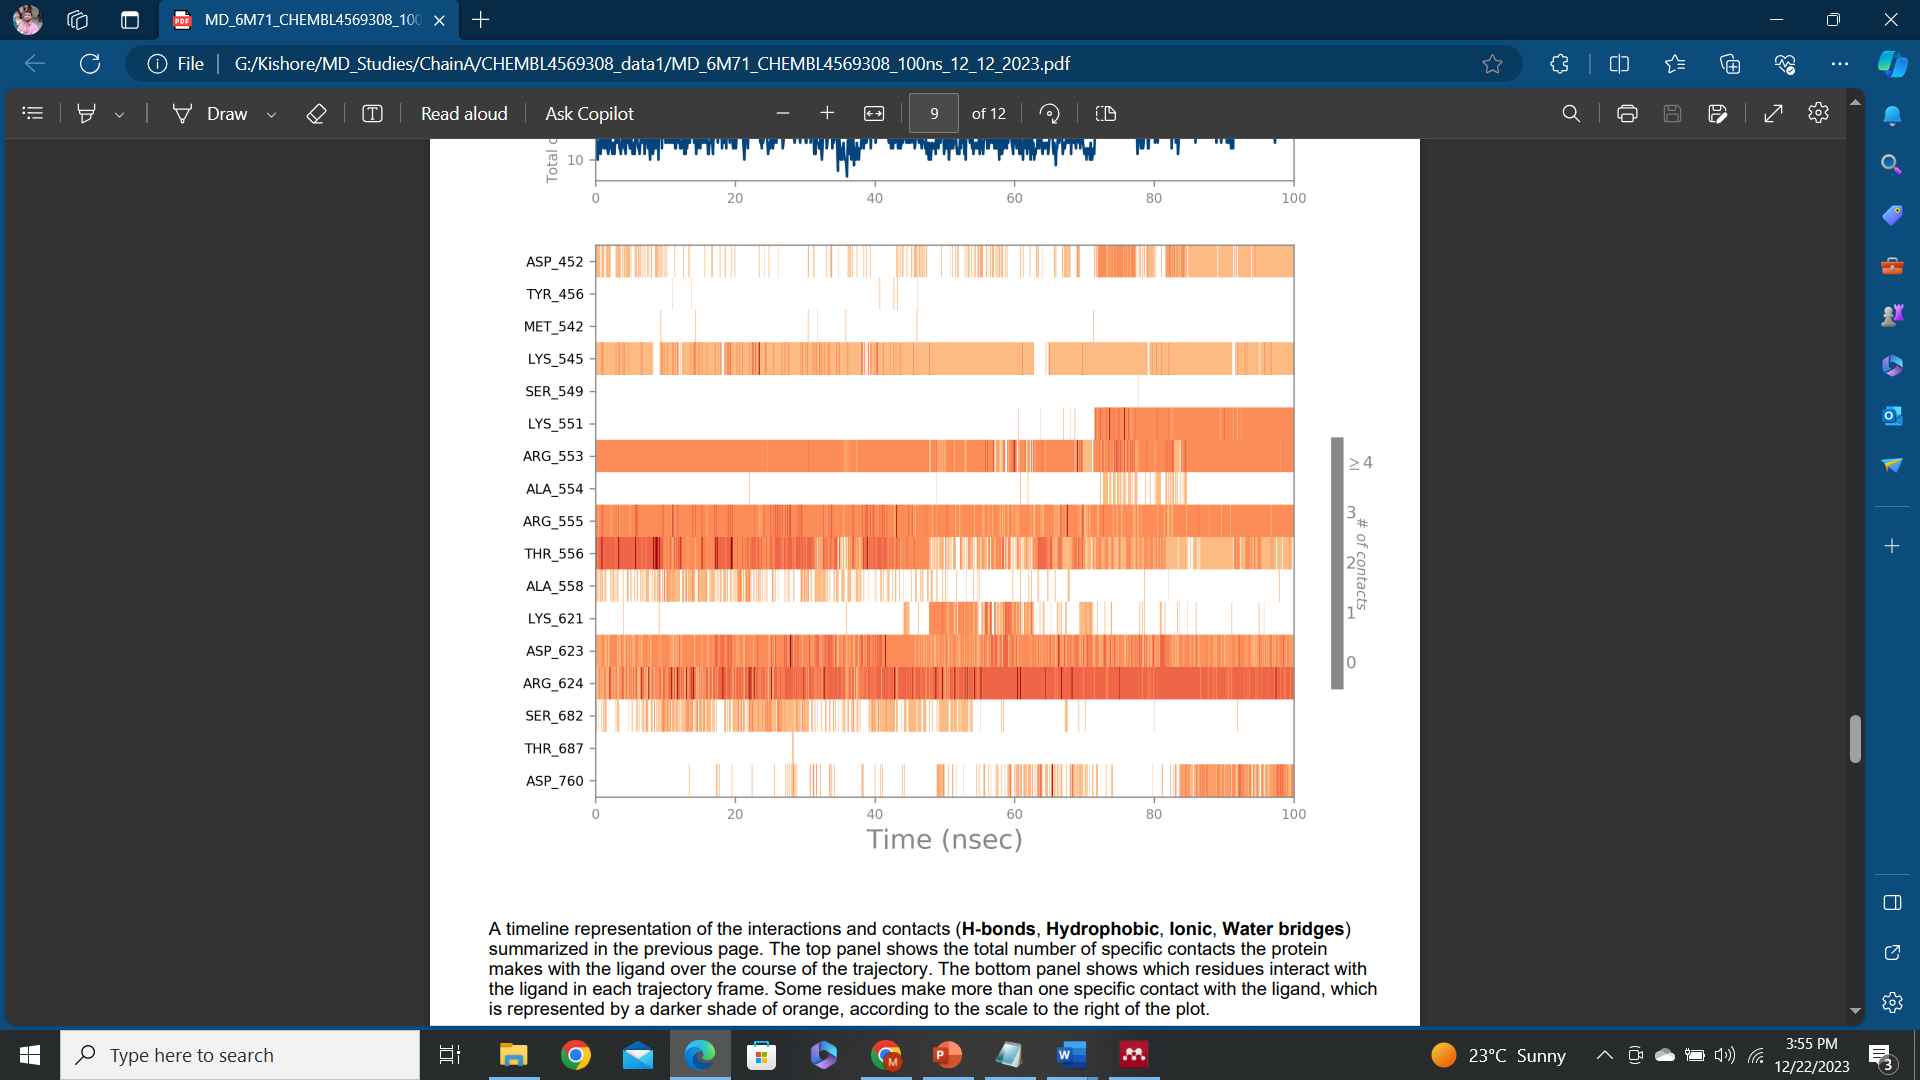 | 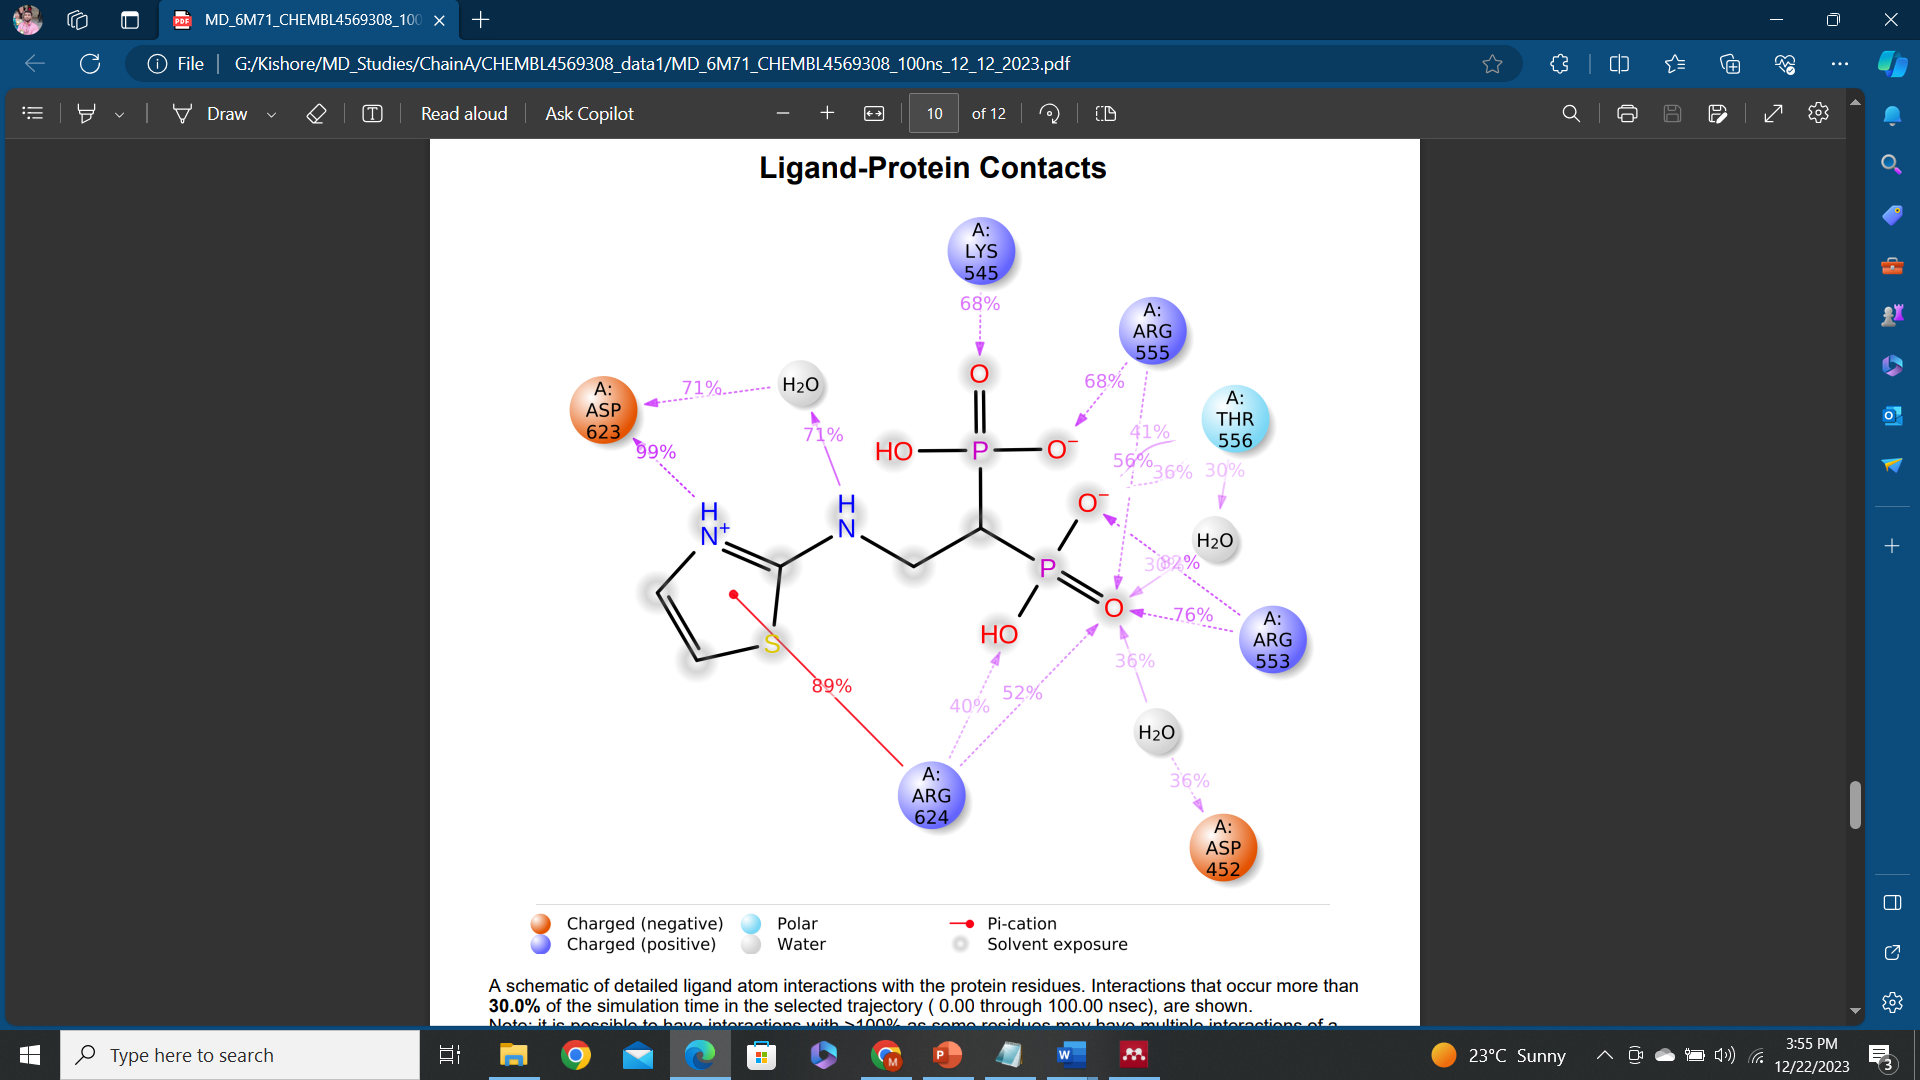 |
| 7. | CHEMBL98211†  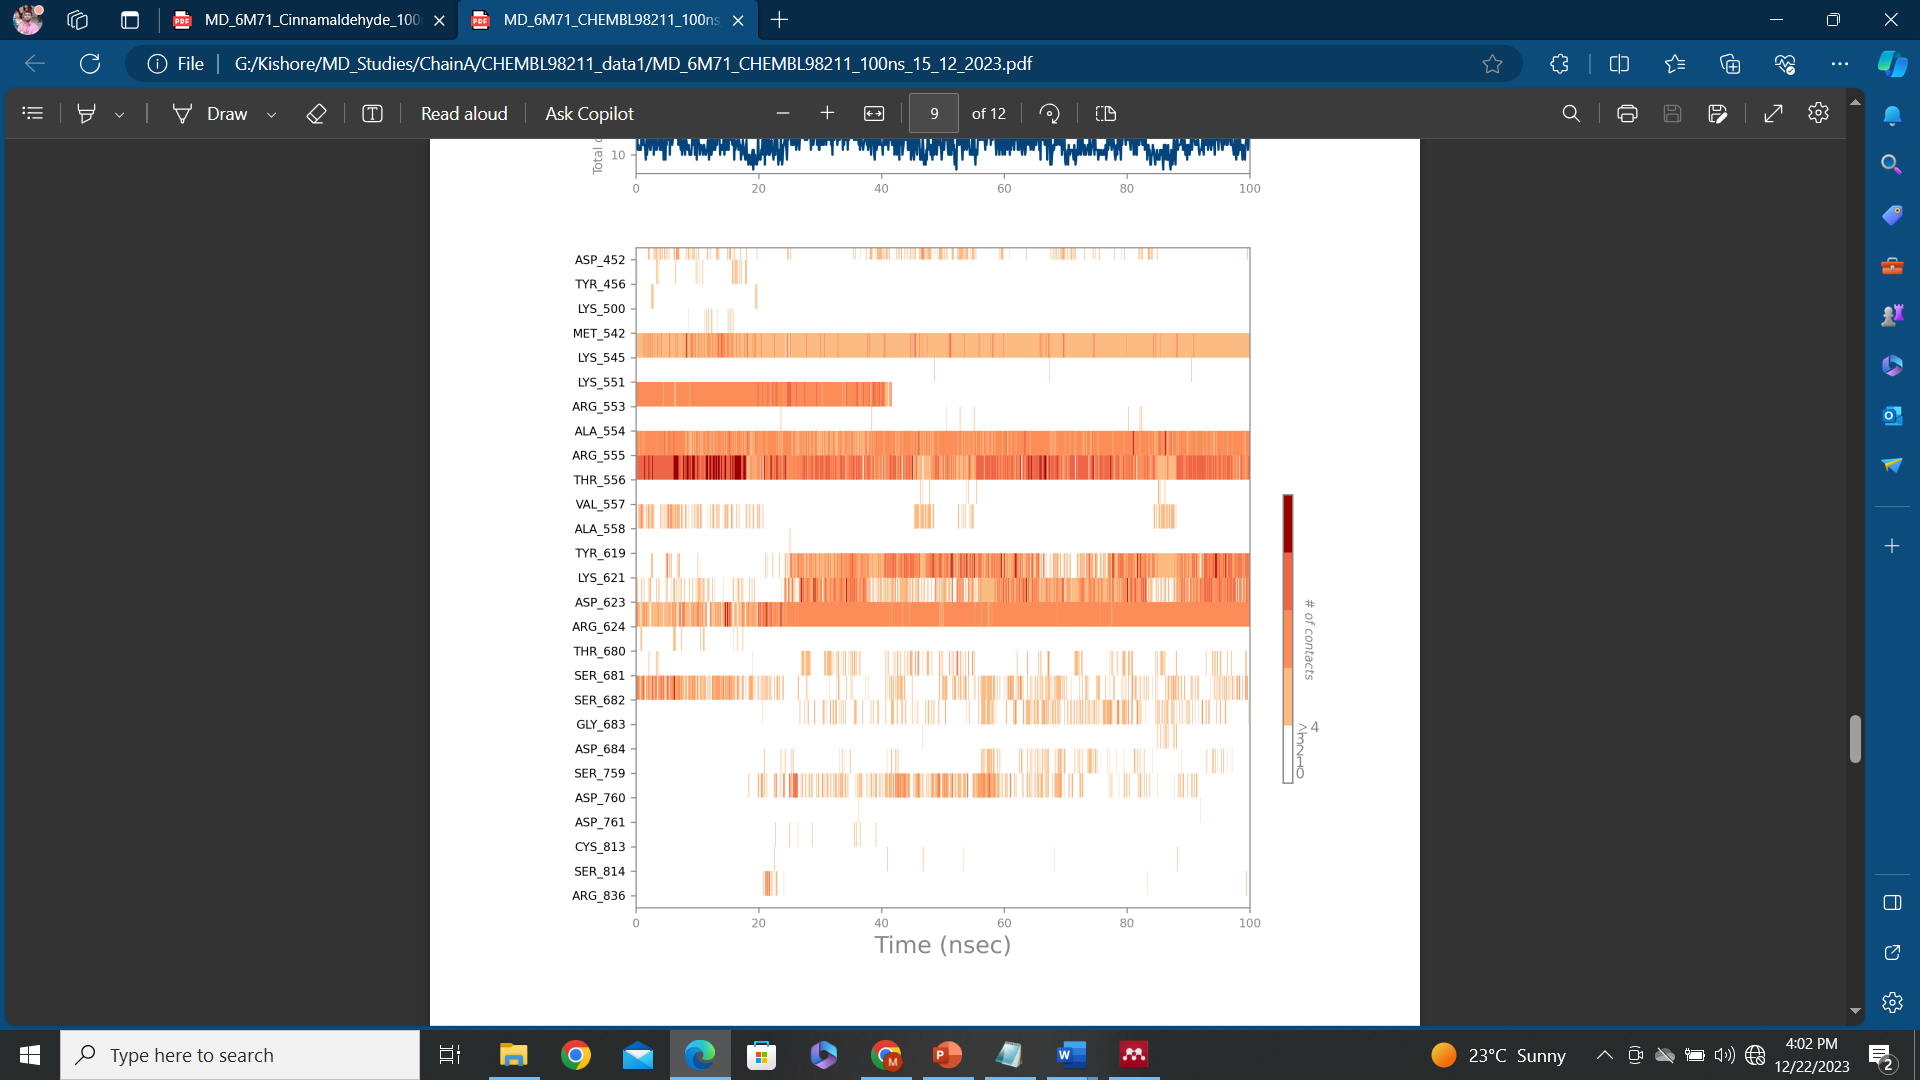 | 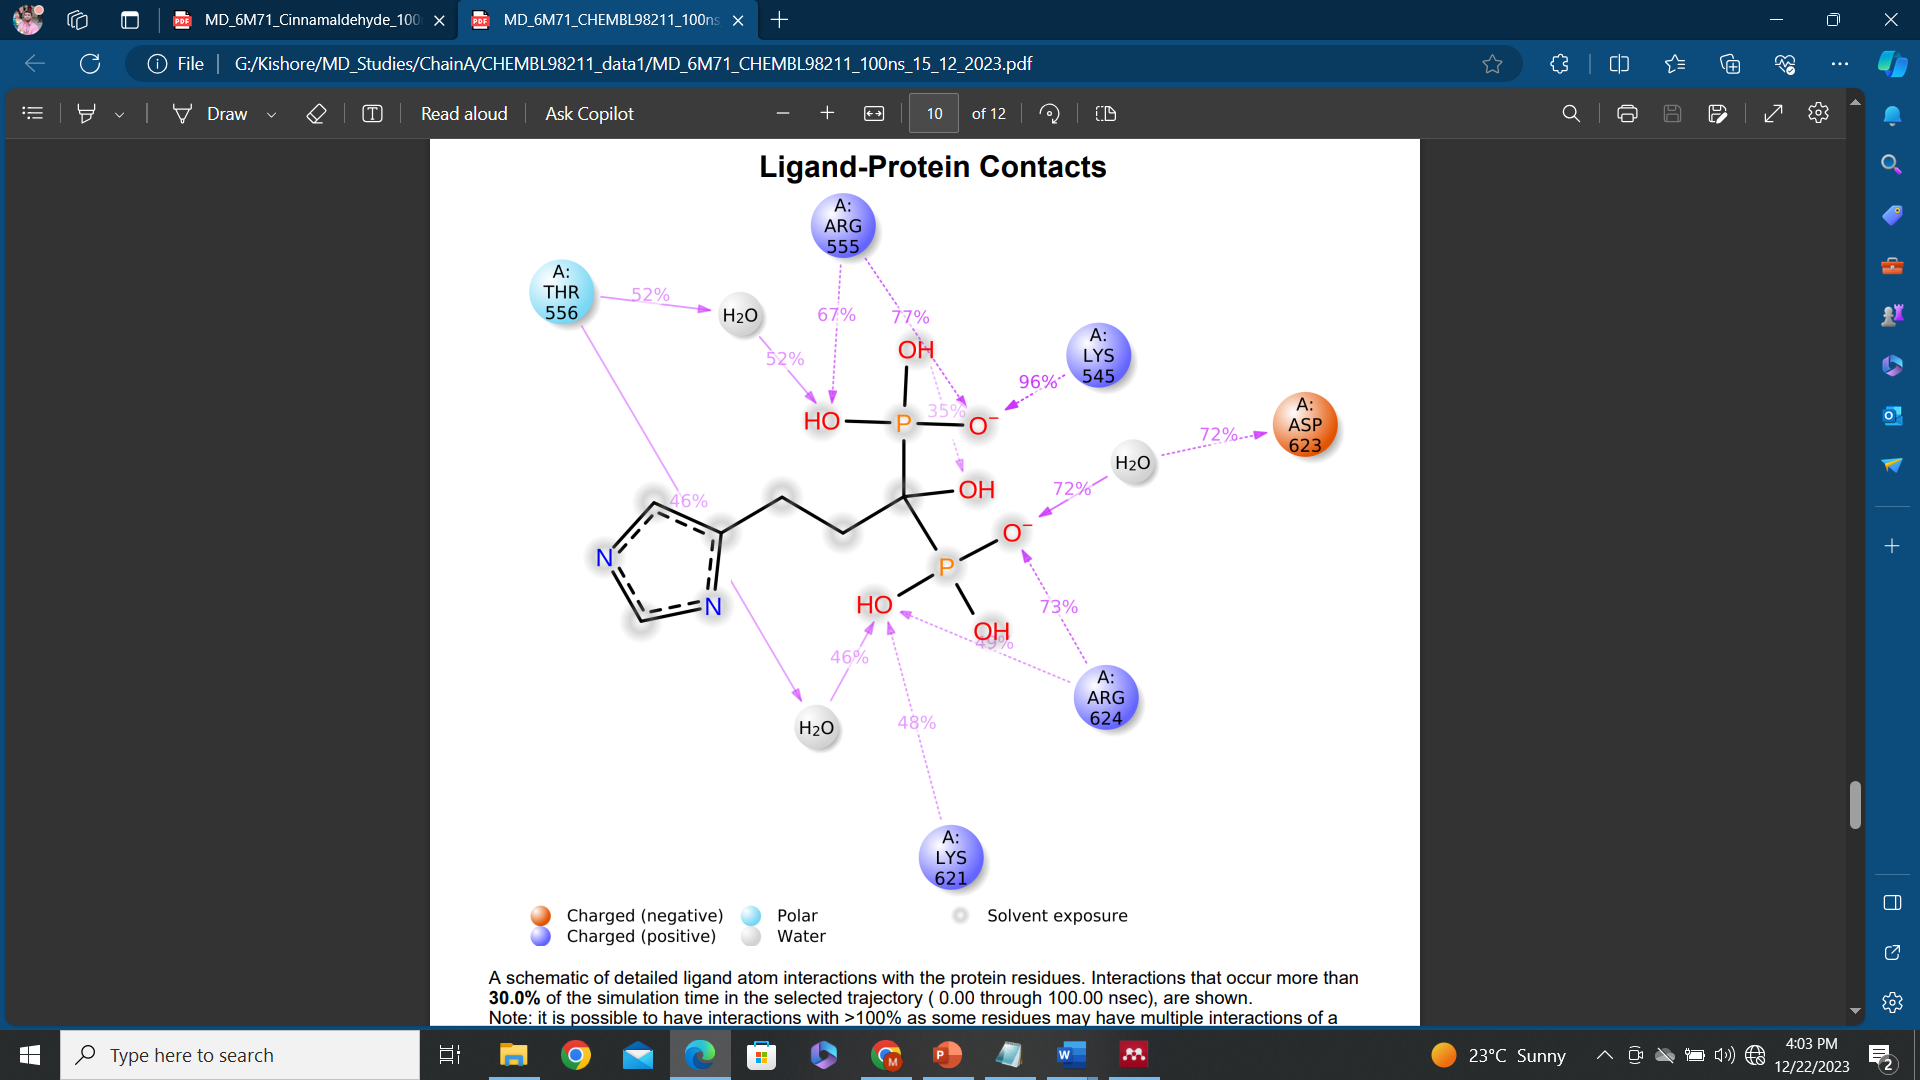 |
| 8. | CHEMBL164344†  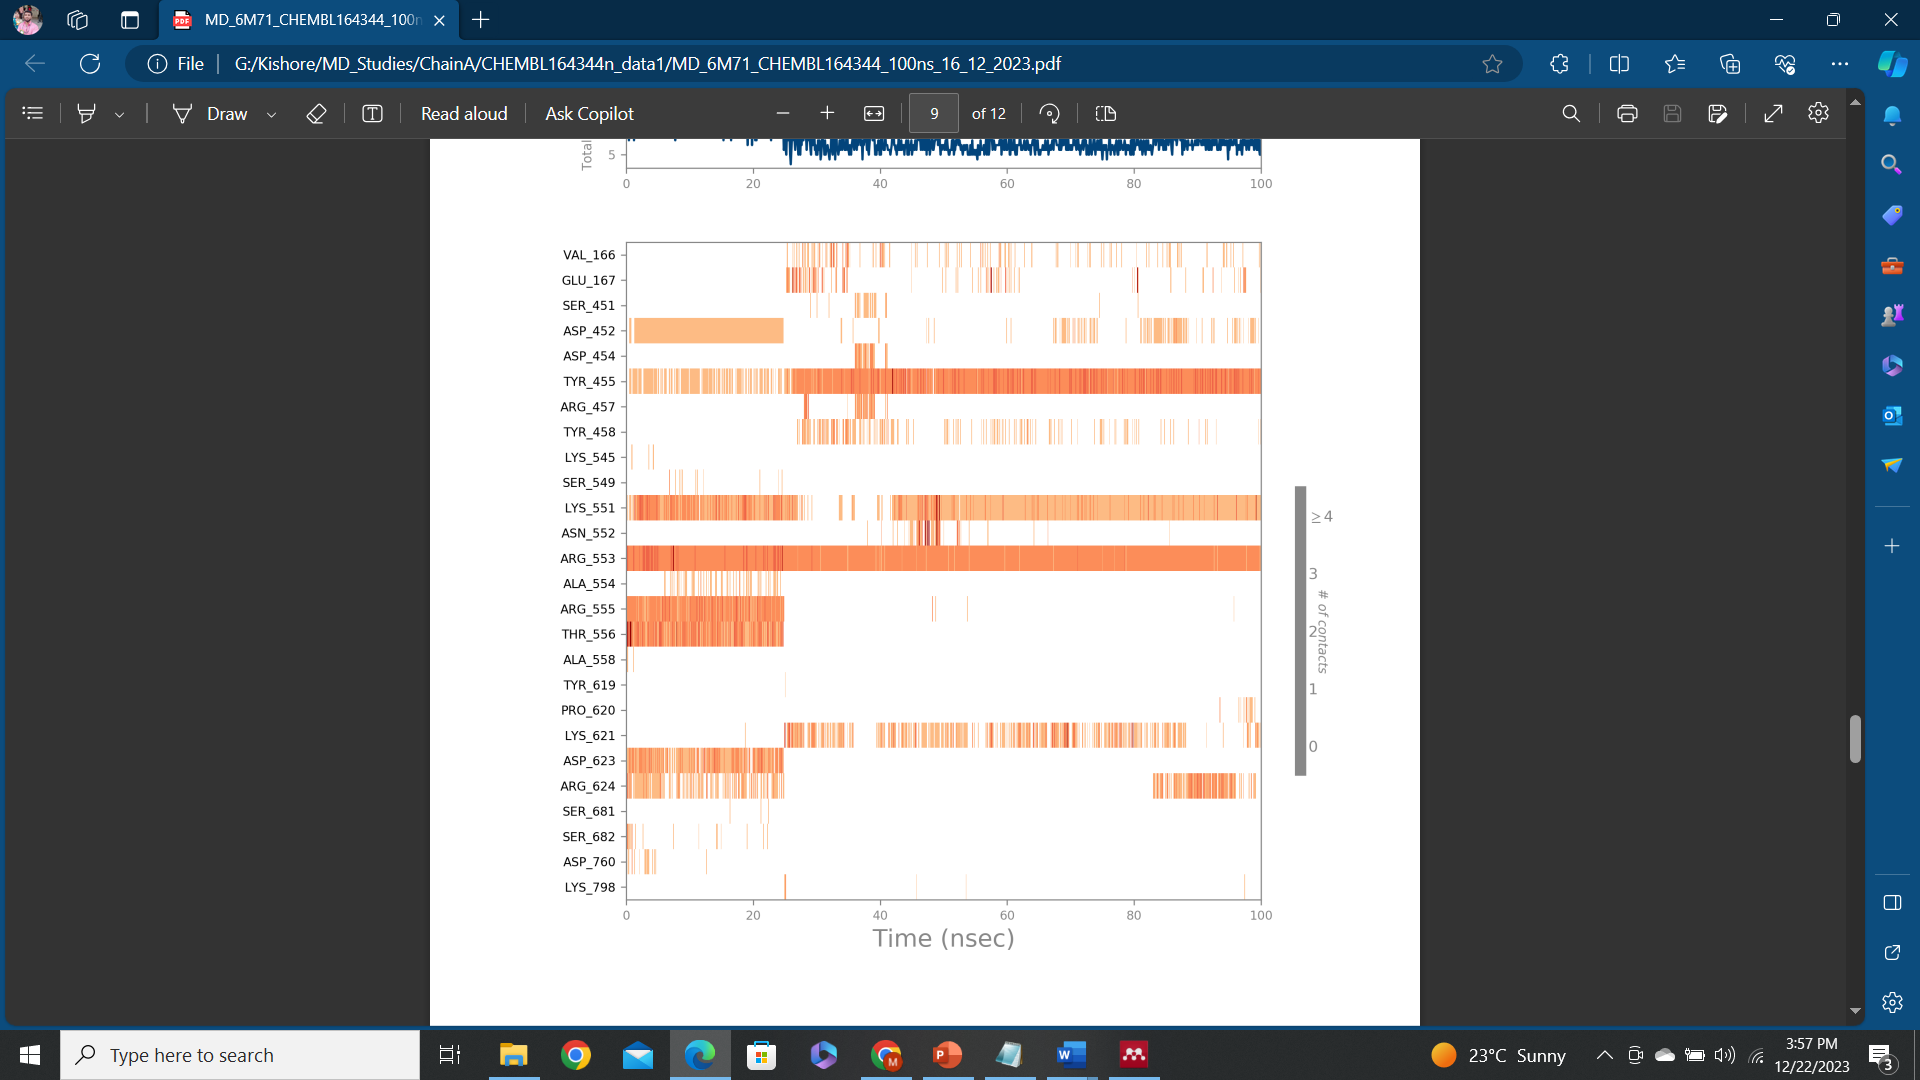 | 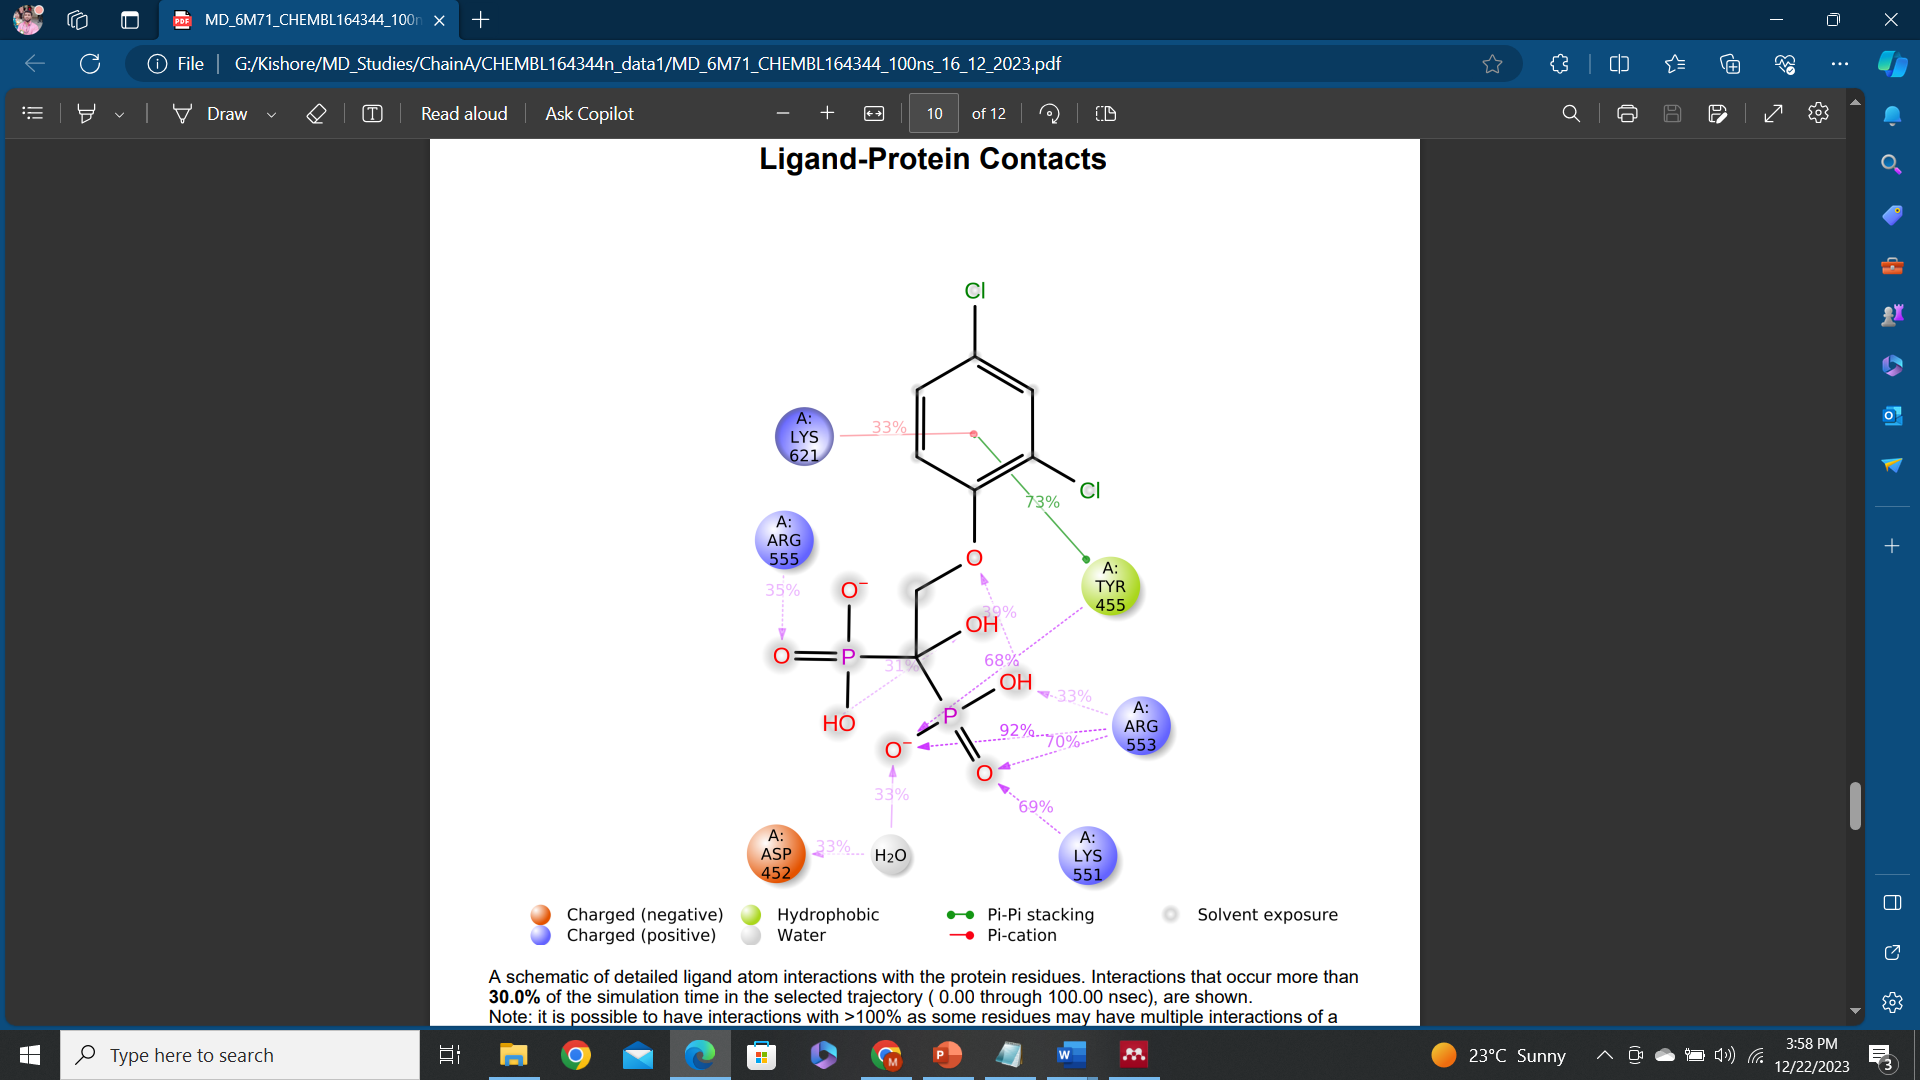 |
| 9. | Remdesivir  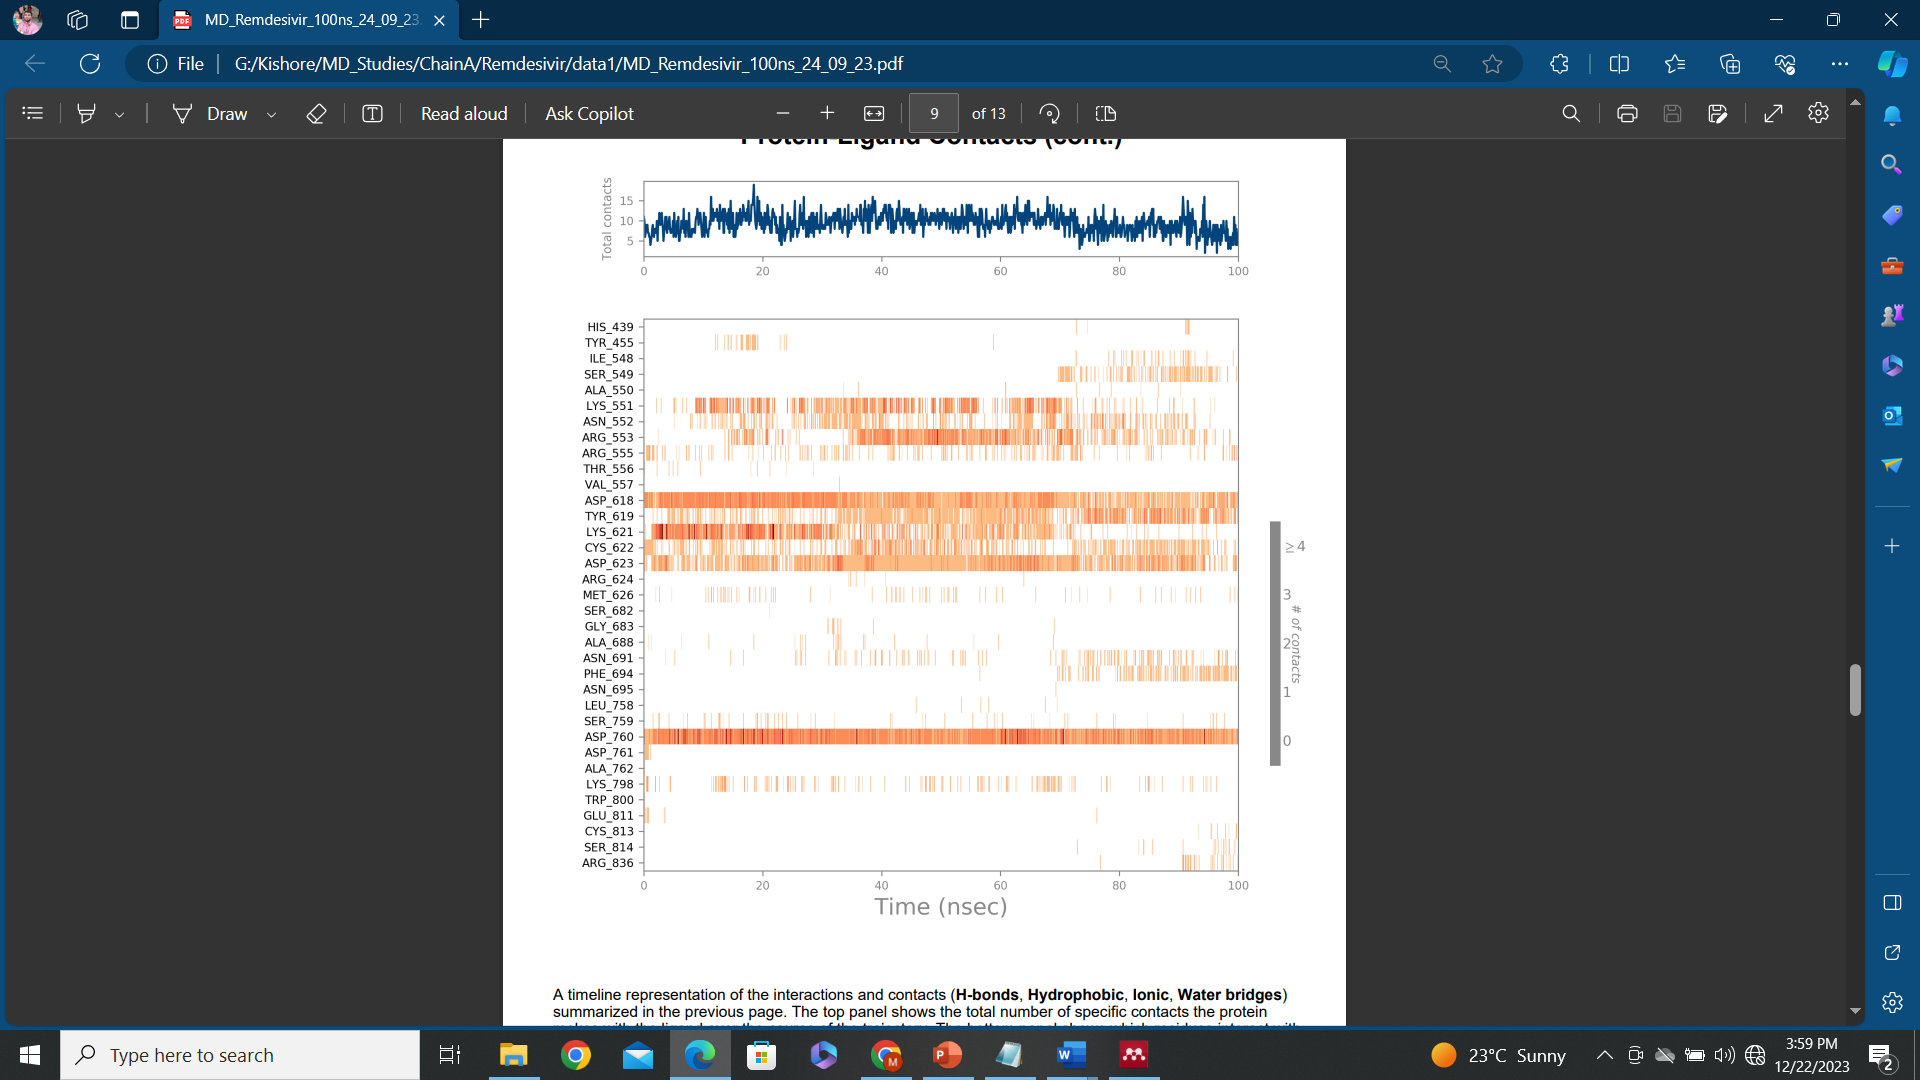 | 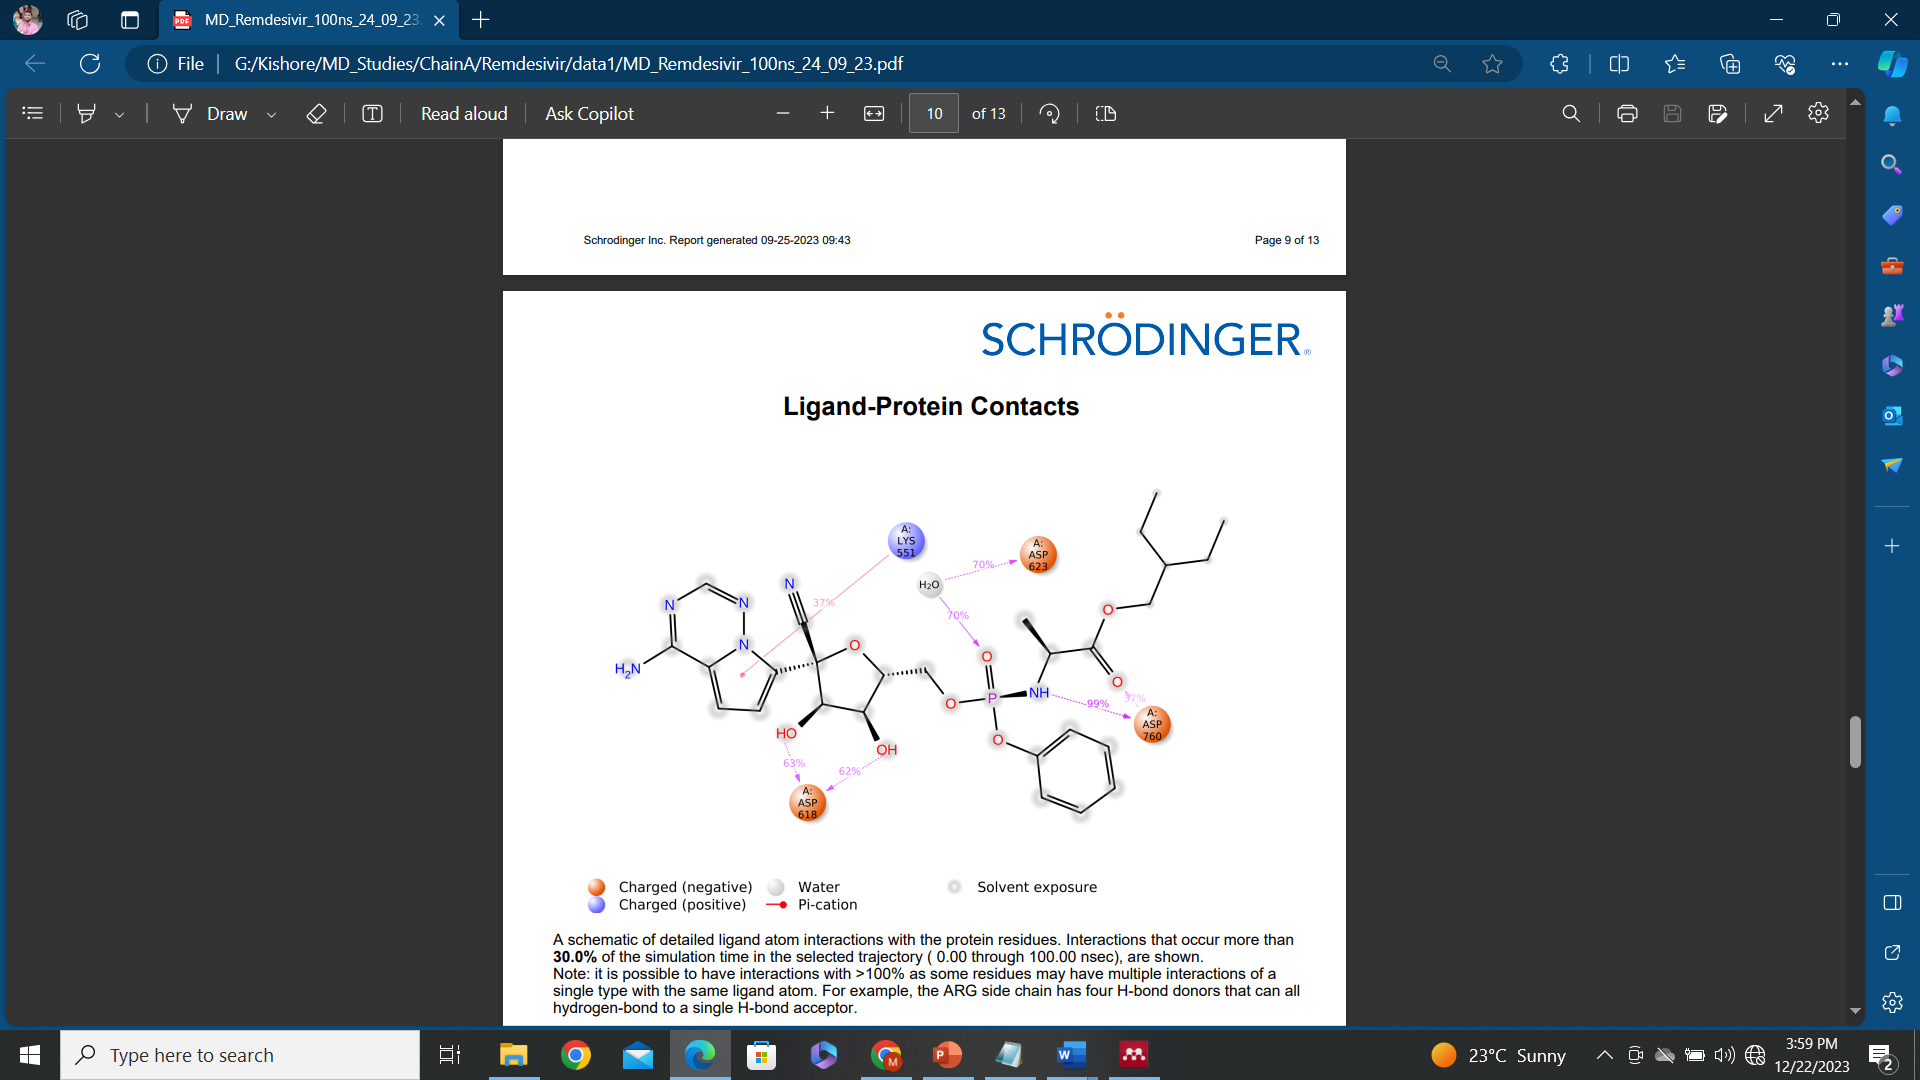 |
| 10. | Cinnamaldehyde  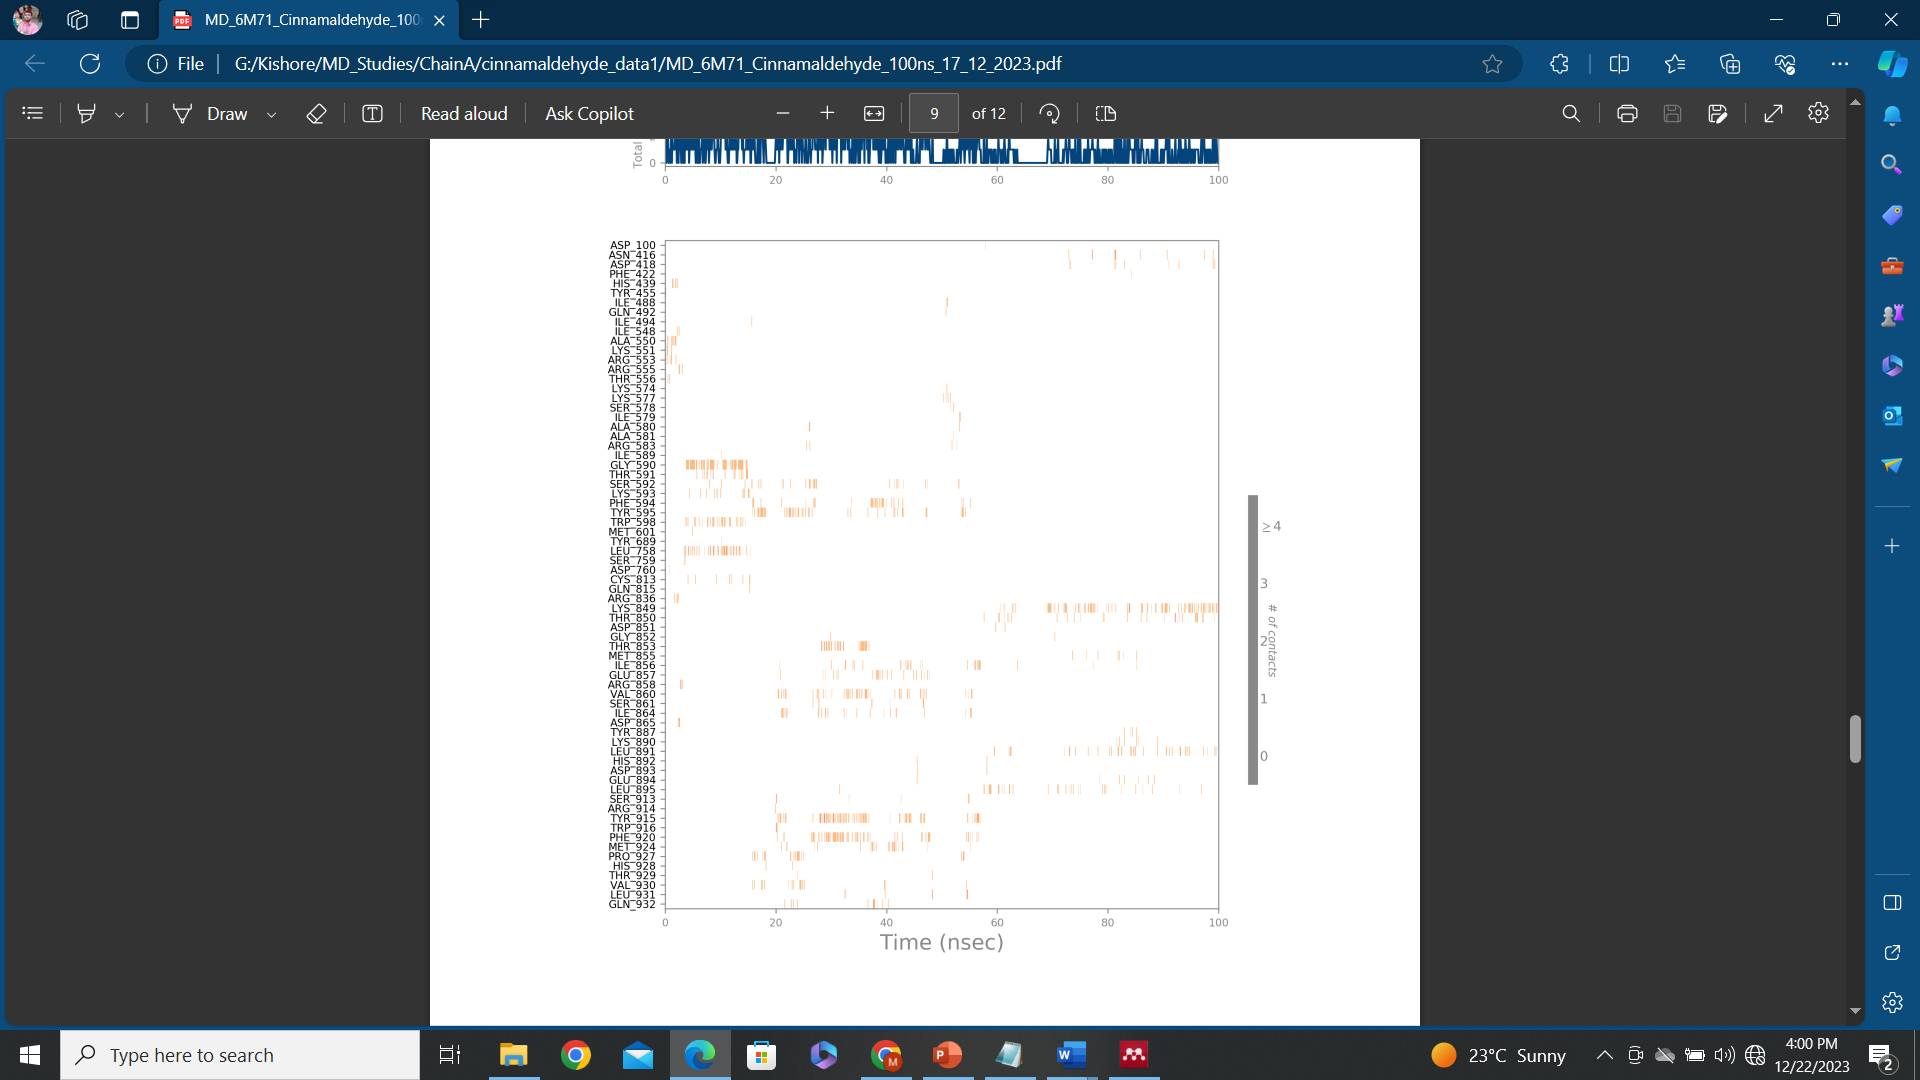 | 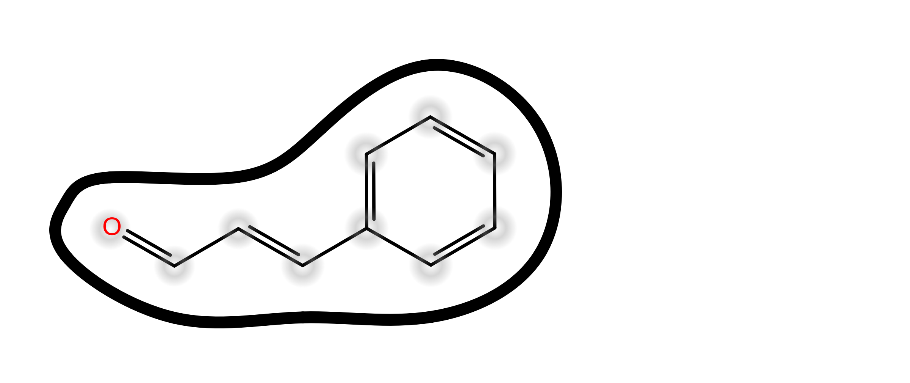 |

† indicates protomers
